1 **Light-dependent THRUMIN1 phosphorylation regulates its association with actin**  
2 **filaments and 14-3-3 proteins**

3

4 Matthew E. Dwyer and Roger P. Hangarter

5 Department of Biology, Indiana University, Bloomington, IN 47405, USA

6

7 **Short title: Phosphorylation regulation of chloroplast movement**

8

9 **One Sentence Summary:**

10 Site-directed mutagenesis of THRUMIN1 revealed critical sites involved in blue light-  
11 dependent localization of THRUMIN1 to actin filaments, 14-3-3 proteins, and its  
12 regulation of chloroplast movement.

13

14 **Author Contribution:** M.D. designed the experiments with guidance from R.H.; M.D.  
15 performed the experiments and analyzed the data; M.D. and R.H. interpreted the data;  
16 M.D. wrote the manuscript and R.H. edited the manuscript.

17

18 **Funding Information:** This work was supported by the National Science Foundation  
19 Grant MCB-0848083 and Indiana University.

20

21 **Author for contact email:** rhangart@indiana.edu

22

23 **Abstract:**

24           Light-dependent chloroplast movements in leaf cells contribute to the  
25 optimization of photosynthesis. Low light conditions induce chloroplast accumulation  
26 along periclinal cell surfaces, providing greater access to the available light, whereas  
27 high light induces movement of chloroplasts to anticlinal cell surfaces providing  
28 photodamage protection and allowing more light to reach underlying cell layers. The  
29 THRUMIN1 protein is required for normal chloroplast movements in *Arabidopsis*  
30 *thaliana* and has been shown to localize at the plasma membrane and to undergo rapid  
31 light-dependent interactions with actin filaments through the N-terminal intrinsically  
32 disordered region. A predicted WASP-Homology 2 (WH2) domain was found in the  
33 intrinsically disordered region but mutations in this domain did not disrupt localization of  
34 THRUMIN1:YFP to actin filaments. A series of other protein truncations and site-  
35 directed mutations of known and putative phosphorylation sites indicated that a  
36 phosphomimetic mutation (serine to aspartic acid) at position 170 disrupted localization  
37 of THRUMIN1 with actin filaments. However, the phosphomimetic mutant rescued the  
38 *thrumin1-2* mutant phenotype for chloroplast movement and raises questions about the  
39 role of THRUMIN1's interaction with actin. Mutation of serine 146 to aspartic acid also  
40 resulted in cytoplasmic localization of THRUMIN1:YFP in *Nicotiana benthamiana*.  
41 Mutations to a group of putative zinc-binding cysteine clusters implicates the C-terminus  
42 of THRUMIN1 in chloroplast movement. Phosphorylation-dependent association of  
43 THRUMIN1 with 14-3-3 KAPPA and OMEGA were also identified. Together, these  
44 studies provide new insights into the mechanistic role of THRUMIN1 in light-dependent  
45 chloroplast movements.

46 **Introduction:**

47           Plants have evolved several light-sensing mechanisms that protect chloroplasts  
48 from photodamage and for photosynthetic optimization (Li et al., 2009). Light-dependent  
49 chloroplast movements are a cellular level response to dynamic changes in light levels  
50 in their environment. In low light conditions, leaf mesophyll cells initiate what is known  
51 as the accumulation response in which the cells position their chloroplasts along the top  
52 and bottom periclinal cell faces (Zurzycki, 1955). When exposed to strong light, the cells  
53 initiate an avoidance response in which they position their chloroplasts along the  
54 anticlinal sides of the cells (Kasahara et al., 2002). In angiosperms, this mechanism is  
55 controlled by the Phototropin1 (Phot1) and Phototropin2 (Phot2) blue light  
56 photoreceptors (Jarillo et al., 2001; Kagawa et al., 2001; Sakai et al., 2001). The two  
57 photoreceptors are functionally redundant but Phot1 primarily induces the accumulation  
58 response while Phot2 induces the avoidance response (Sakai et al., 2001; Luesse et  
59 al., 2010). In addition to the Phototropins, phytochromes (red/far red photoreceptors)  
60 have been shown to play a role in modulating the response to blue light-induced  
61 chloroplast movement through inhibition of Phototropin-related pathways and aiding in  
62 the transition from low to high light responses (DeBlasio et al., 2003; Luesse et al.,  
63 2010). The importance of chloroplast movements has been demonstrated by  
64 observations of significantly more photodamage in *Arabidopsis thaliana* plants that have  
65 defective Phototropins and/or mutated forms of other proteins needed for normal  
66 chloroplast positioning, when compared to wild-type plants (Kasahara et al., 2002;  
67 Davis and Hangarter, 2012). In addition to reducing photodamage, the avoidance

68 response in palisade mesophyll cells allows more photons to reach underlying spongy  
69 mesophyll cells and enhances whole-leaf photosynthesis (Davis and Hangarter, 2012).

70 Angiosperms require the actin cytoskeleton for normal chloroplast movements  
71 (Malec et al., 1996; Kandasamy and Meagher, 1999; Kadota et al., 2009). No genetic  
72 evidence for motor proteins has been seen after extensive mutant screens so research  
73 has focused on identifying how actin dynamics may drive chloroplast movement (Avisar  
74 et al., 2008; Suetsugu et al., 2010; Wada, 2013). Using the actin-binding probe,  
75 GFP:mTalin, actin filaments have been shown to associate with the chloroplast outer  
76 envelope in a light-dependent way (Kadota et al., 2009). Upon irradiation with high  
77 intensity blue light, the GFP:mTalin was found to disappear from the chloroplast-  
78 associated actin filaments (cp-actin) suggesting disassociation of cp-actin on the time  
79 scale of minutes. Upon removal of the blue light stimulus, GFP:mTalin-labeled cp-actin  
80 was found to reappear (Kadota et al., 2009). Moreover, when only a portion of a cell  
81 was exposed to blue light, the chloroplasts in the irradiated area lost their GFP:mTalin-  
82 labeled cp-actin but as the chloroplasts were leaving the lit region of a cell, GFP:mTalin-  
83 labeled cp-actin was seen to reappear along the leading edge of movement. The Phot2-  
84 dependent dynamics of cp-actin are thought to be critical to the mechanism that drives  
85 the chloroplast movements (Kong et al., 2013).

86 THRUMIN1 is a light-dependent, plasma membrane-localized F-actin bundling  
87 protein and loss of THRUMIN1 was found to result in reduced chloroplast motility  
88 suggesting a role for THRUMIN1 bundling of F-actin at the plasma membrane (Whippo  
89 et al., 2011). THRUMIN1 requires myristoylation and/or the palmitoylation at the N-  
90 terminus for proper localization to filamentous actin and for chloroplast movements

91 (Whippo et al., 2011). The intrinsically disordered region (IDR) of THRUMIN1 was  
92 previously shown to be the region that confers F-actin binding (Whippo et al., 2011) but  
93 the IDR domain alone failed to rescue chloroplast movements in the *thrumin1-2* mutant.  
94 Expression of just the C-terminal region also failed to rescue the mutant phenotype and  
95 showed diffuse, non-filamentous localization (Whippo et al., 2011). THRUMIN1 is  
96 conserved for its glutaredoxin-like domain but the IDR and the C-terminal cysteine-rich  
97 region appear to be the critical regions for the light-induced bundling activity of  
98 THRUMIN1 (Whippo et al., 2011).

99         The requirement of F-actin for chloroplast movement is undisputed but the  
100 signaling cascade and motility mechanism that regulates light-dependent chloroplast  
101 movement remain unknown. Given that Phot1 and Phot2 are blue light receptor kinases  
102 (Liscum and Briggs, 1995; Briggs and Huala, 1999), phosphorylation is likely to play a  
103 role in regulating chloroplast movement. Phosphoproteomic analyses of plasma  
104 membrane associated proteins showed that THRUMIN1 was among the proteins found  
105 to undergo light-dependent phosphorylation (Boex-Fontvieille et al., 2014). Specifically,  
106 serine 113 or 115 and serine 164 were found to be more phosphorylated in the dark and  
107 mutations of those residues were reported to have altered light-dependent chloroplast  
108 movement (Boex-Fontvieille et al., 2014).

109         The schematic view of THRUMIN1 shown in Fig. 1 shows its major domains and  
110 predicted sites of phosphorylation, 14-3-3 protein recognition motifs, a putative WH2  
111 domain, and the location of several putative zinc-binding cysteine residues. Here we  
112 report the results of a number of new site-directed mutants and protein truncations of  
113 THRUMIN1 that focused on the potential roles of phosphorylation, protein-protein

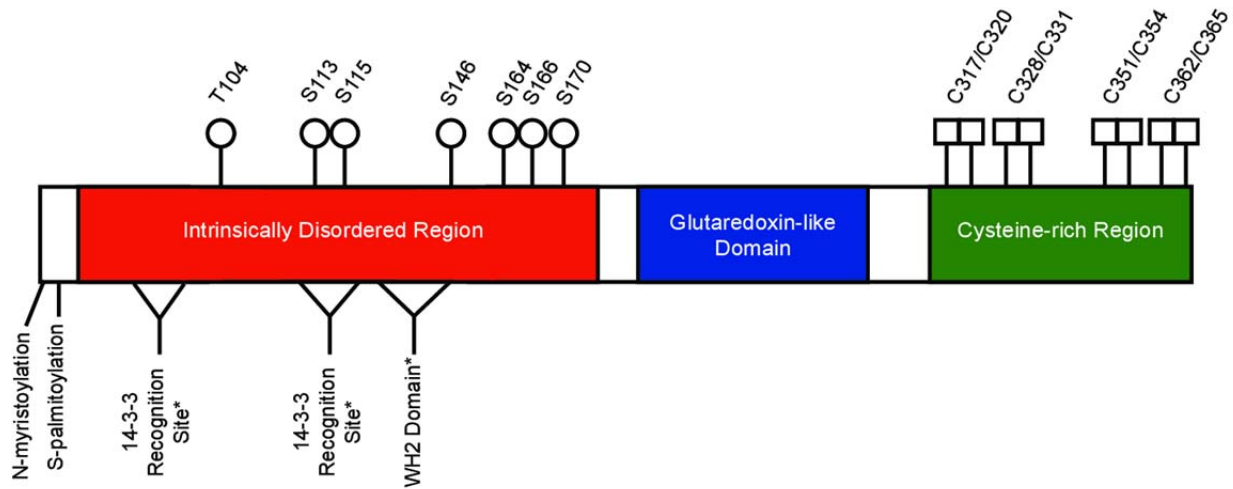

**Figure 1. Schematic of THRUMIN1 showing known and predicted sites of interest.** Previously known sites in the intrinsically disordered region (red) include the N-myristoylation and S-palmitoylation (plasma membrane tethering) and phosphorylation sites S113, S115, S164, and S166. S113, S115, S164, and S166 were previously reported as phosphorylation sites by (Boex-Fontvieille et al., 2014). Phosphorylation sites, T104 and S146, were identified in this study by mass spectrometry. Serine 170 is a putative phosphorylation site that we found in this study to be important for THRUMIN1 function. Two putative 14-3-3 recognition sites (amino acids 50-54 and 111-117) and a putative WASP Homology-2 (WH2) actin-binding domain (amino acids 127-144) were predicted by the Eukaryotic Linear Motif program. Putative zinc-binding cysteine residues are shown in the cysteine-rich region (green). The glutaredoxin-like domain (blue), has no known function in chloroplast movement (Whippo et al., 2011).

114 binding, and the putative WH2 domain in THRUMIN1's ability to localize to F-actin and  
115 modulate light-dependent chloroplast movements. We found specific phosphorylation-  
116 dependent interactions between THRUMIN1 and 14-3-3 KAPPA and OMEGA. The  
117 predicted WH2 domain did not appear to be the site of actin binding but mutation of two  
118 putative phosphorylation sites near the WH2 domain disrupted THRUMIN1-actin  
119 filament localization without interfering with chloroplast movement dynamics suggesting  
120 that THRUMIN1's interaction with cp-actin may not be directly associated with the  
121 motility mechanism as previously thought. These and other new results reported in this  
122 paper lead us to propose that THRUMIN1 may function in anchoring chloroplasts to the  
123 plasma membrane rather than being part of the motive force for chloroplast movements.  
124 Overall, our studies provide new insights into the role of THRUMIN1 phosphorylation  
125 and protein associations involved in the molecular mechanism of chloroplast movement.

126

127

## 128 **Results**

129

### 130 **THRUMIN1 dynamically associates with chloroplast-associated actin filaments**

131 THRUMIN1 is a plasma-membrane associated protein with actin-bundling activity

132 and is required for normal light-dependent chloroplast movements in *Arabidopsis*

133 *thaliana* (Whippo et al., 2011). Our time-lapse studies of the dynamics of

134 THRUMIN1:YFP localization in palisade mesophyll cells showed that it associates with

135 actin filaments at the periphery of the chloroplast envelope in a light-dependent manner

136 (Fig. 2) similar to what has been observed with the actin-binding GFP:mTalin probe

137 (Kadota et al., 2009; Kong et al., 2013). After dark acclimation, THRUMIN1 was

138 localized around the periphery of the chloroplast outer envelope but upon light

139 stimulation of a portion of a cell, THRUMIN1 rapidly dissociated from the chloroplast

140 periphery and then reassociated at the leading edge of the chloroplasts when they

141 began to move towards areas of the cell away from the blue light (Fig. 2, Supplemental

142 Fig. S1A). The difference between the THRUMIN1 fluorescence on the leading edge

143 versus the lagging edge of the chloroplast was significant ( $p=0.0291$ ) at peak movement

144 of the chloroplast (Supplemental Fig. S1B). The dynamics of blue light-induced

145 THRUMIN1 relocalization can be seen in the Supplemental Movies S1 and S2.

146

### 147 **The chloroplast outer envelope displays amoeboid-like movements**

148 Most research on chloroplast movements has relied on chlorophyll

149 autofluorescence for following their movements and associations with other proteins. In

150 a study by Kong et al (2013) they used the chloroplast membrane marker OEP7:YFP



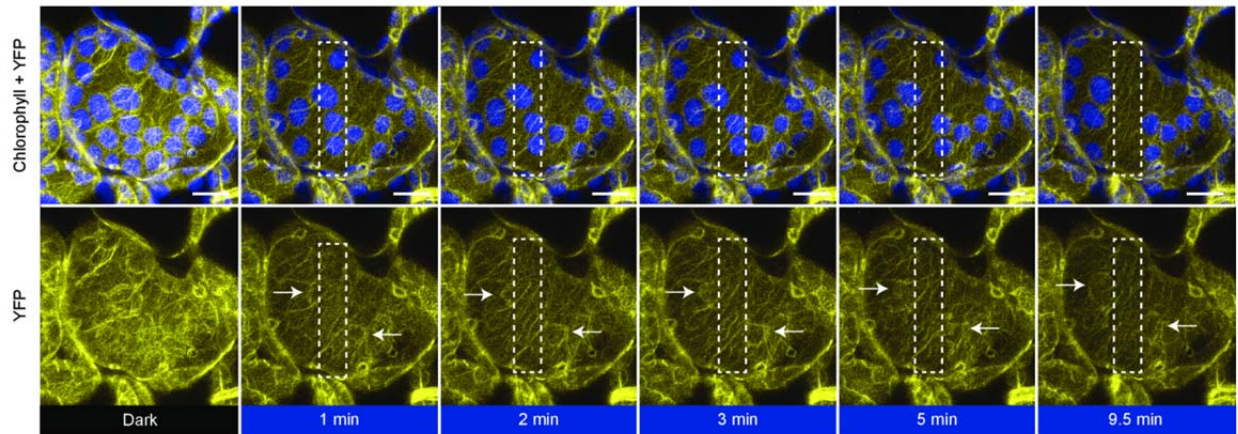

**Figure 2. THRUMIN1:YFP dynamically localizes to cp-actin filaments in a light-dependent manner.** In a dark state (YFP excitation, 514nm), 35S:THRUMIN1:YFP expressed in *thrumin1-2 A. thaliana* cells displayed a uniform, basket-like organization around the chloroplast periphery. Within a minute of blue light stimulation (white rectangle), THRUMIN1:YFP disappeared and reorganized towards the leading edge of movement as indicated by the white arrows in the YFP channel. After 10 minutes of blue light stimulation, the chloroplasts inside the white rectangle have exited the region and the THRUMIN1:YFP filaments started to become more peripheral around the chloroplasts. Chlorophyll autofluorescence is false-colored blue and the YFP channel is separated. Representative time-lapse images are shown for the dark treatment (514nm for YFP excitation) and blue light stimulation intervals (470nm and 514nm). The scale bar indicates a 5  $\mu$ m distance.

151 and showed a correlation between chloroplast movements and movement of chloroplast  
152 envelope membranes away from the thylakoid membrane (Kong et al., 2013). In this  
153 study, we made use of the greater contrast available between chlorophyll  
154 autofluorescence and the stroma-localized probe tpFNR:YFP to observe chloroplast  
155 membrane dynamics and found that the chloroplast envelope exhibited highly dynamic,  
156 pseudopod-like protrusions that appear to be associated with chloroplast movements  
157 (Fig 3A and Supplemental Movies S3 and S4). The membrane protrusions became  
158 more dynamic in response to localized blue-light exposure and, consistent with Kong et  
159 al. (2013), the protrusions quickly became more pronounced near the leading edge of  
160 moving chloroplasts and corresponded to where THRUMIN1 was also found to localize

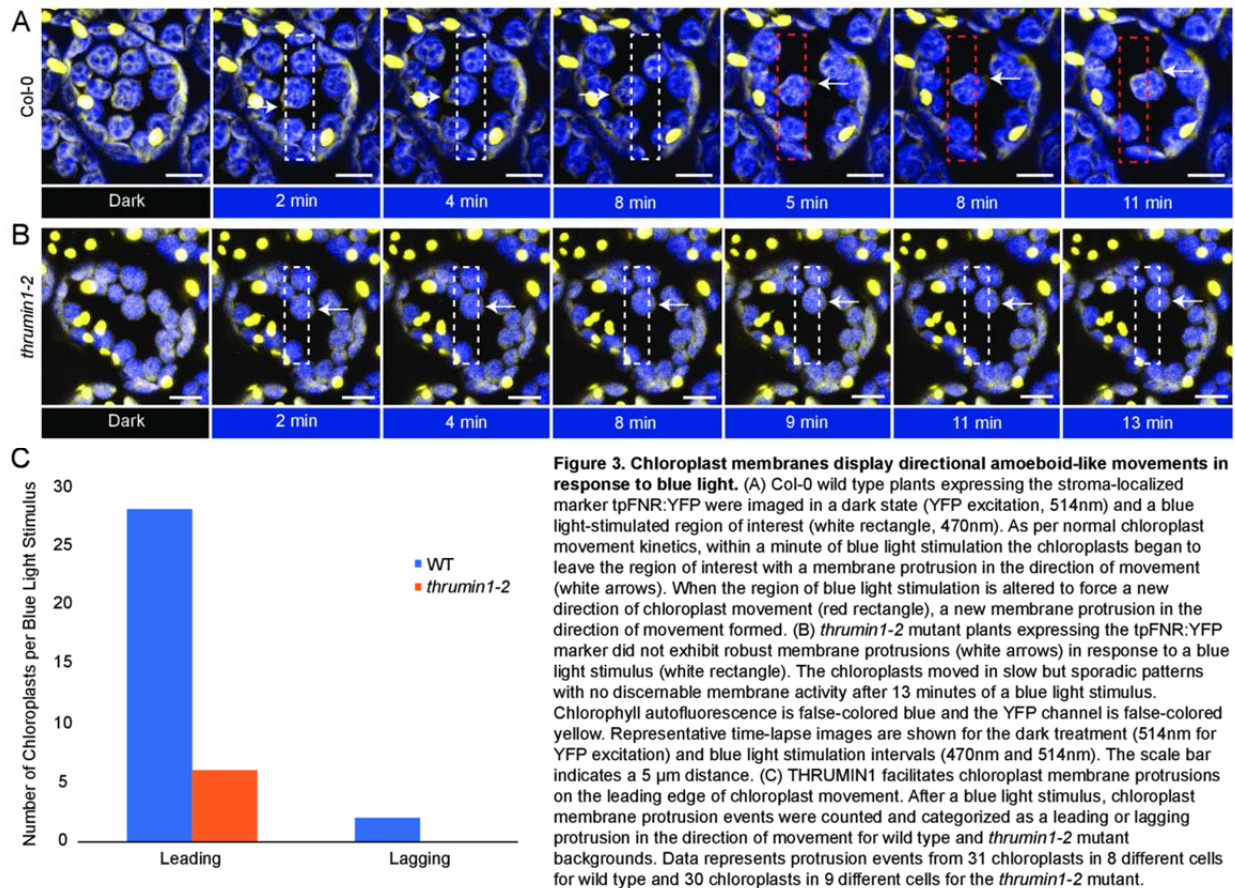

161 after light stimulation (Fig. 2, Fig. 3A,C, and Supplemental Movies S1, S2, S3, and S4).  
 162 Upon removal of the blue light stimulus, the protrusions became more distributed  
 163 around the chloroplast periphery (Fig 3A and Supplemental Movies S3 and S4). In  
 164 *thrumin1-2* mutant plants expressing the tpFNR:YFP transgene, membrane protrusions  
 165 were not observed and the movement of chloroplasts was more erratic than with wild  
 166 type THRUMIN1 (Fig. 3B,C, Supplemental Movies S5 and S6). Time-lapse movies of  
 167 the pseudopod-like chloroplast membrane protrusions in wild-type plants evoke an  
 168 amoeboid-like crawling behavior. However, unlike the internal forces of actin dynamics  
 169 that drive pseudopod extension in amoeba, chloroplast actin is external and suggests  
 170 that THRUMIN1 has a role in anchoring cp-actin filaments to the plasma membrane.

171

172 **Putative WASP Homology-2 domain encoded in THRUMIN1 does not confer**

173 **localization of THRUMIN1:YFP to actin filaments**

174 The IDR region of THRUMIN1 was previously shown to be required for its actin  
175 binding/bundling activity (Whippo et al., 2011). A predicted WASP Homology-2 (WH2)  
176 domain was identified within the IDR using The Eukaryotic Linear Motif Resource  
177 (Gouw et al., 2018) (Fig. 1). Because WH2 domains in many actin monomer- and  
178 polymer-binding proteins have been found to be important in regulating their interaction  
179 with actin (Paunola et al., 2002; Hertzog et al., 2004; Loomis et al., 2006), the predicted  
180 WH2 domain in THRUMIN1 seemed like a good candidate for THRUMIN1's F-actin  
181 binding activity. However, when the putative WH2 domain was deleted  
182 (THRUMIN1<sup>ΔWH2</sup>:YFP) the protein still localized with F-actin along the chloroplast  
183 periphery when transiently expressed in *N. benthamiana* (Fig. 4B). In addition,  
184 THRUMIN1:YFP with point mutations in the conserved L141 and K142 residues of the  
185 putative WH2 domain also showed normal F-actin localization along the chloroplast  
186 periphery (Fig. 4C). Moreover, expression of the THRUMIN1<sup>ΔWH2</sup>:YFP transgene in *A.*  
187 *thaliana thrumin1-2* mutant plants fully rescued the mutant phenotype (Fig. 4D). Thus,  
188 the predicted WH2 domain does not appear to be directly involved in THRUMIN1's  
189 interaction with F-actin nor for its function in regulating chloroplast movement.

190

191 **Serine 170 is required for light-dependent F-actin localization of THRUMIN1:YFP**

192 Because the deletion of the predicted WH2 domain failed to disrupt the ability of  
193 THRUMIN1 to interact with actin, a series of other internal protein truncations within the



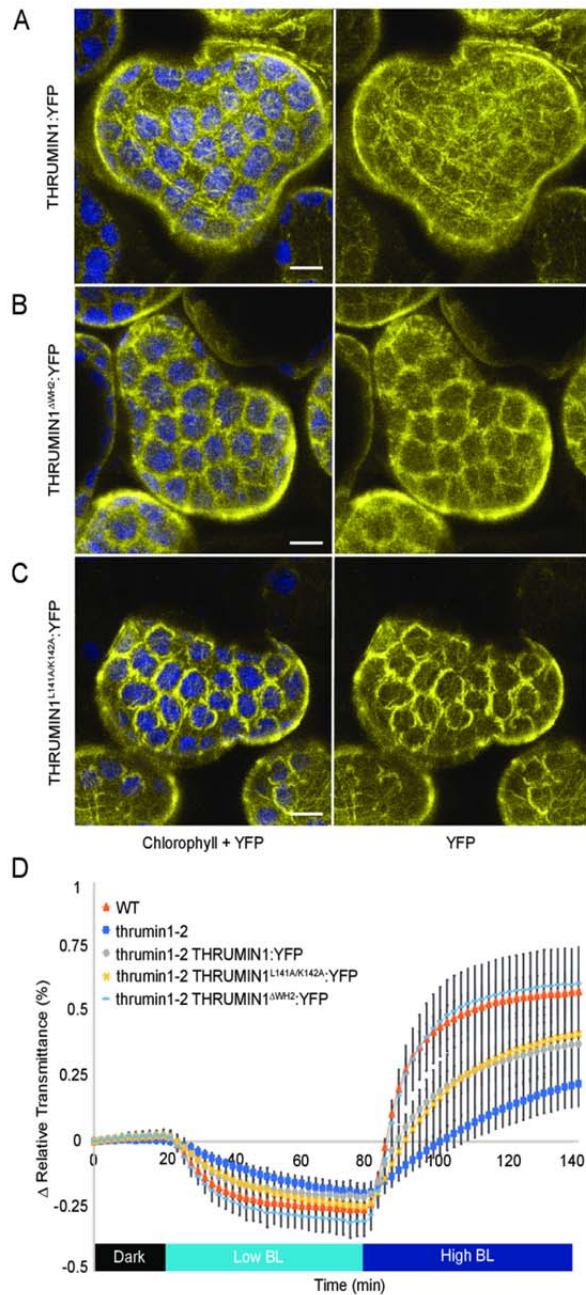

**Figure 4. Effect of deletion of the putative WH2 domain on the localization of THRUMIN1.** (A) Transient expression of wild-type 35S:THRUMIN1:YFP in *N. benthamiana* leaves showed filamentous localization around the chloroplast periphery. (B) Deletion of the WH2 domain from THRUMIN1 and (C) mutagenesis of two conserved amino acid residues (L141 and K142) in the WH2 domain did not disrupt the filamentous localization compared to wild type. Chlorophyll autofluorescence is false-colored blue and the YFP channel is separated. All of the THRUMIN1 constructs were under control of 35S promoter. The scale bar indicates a 5  $\mu$ m distance. (D) Light transmittance assay of chloroplast movements in wildtype (WT) Col-0, *thrum1-2* mutant, *thrum1-2* 35S:THRUMIN1:YFP, *thrum1-2* 35S:THRUMIN1<sup>ΔWH2</sup>:YFP, and *thrum1-2* 35S:THRUMIN1<sup>L141AK142A</sup>:YFP rescue genotypes. Deletion of the WH2 domain conferred wild type chloroplast movements. After establishment of the baseline level of leaf light transmittance after dark acclimation, chloroplast movement was induced by treatment with low blue light (~2  $\mu$ mol m<sup>-2</sup>s<sup>-1</sup>) followed by high blue light intensity (~100  $\mu$ mol m<sup>-2</sup>s<sup>-1</sup>). Standard deviation error bars represent the variance in transmittance values for 8-12 individual plants per genotype.

194 IDR (amino acids #1-201) of THRUMIN1:YFP were created and assayed for their F-

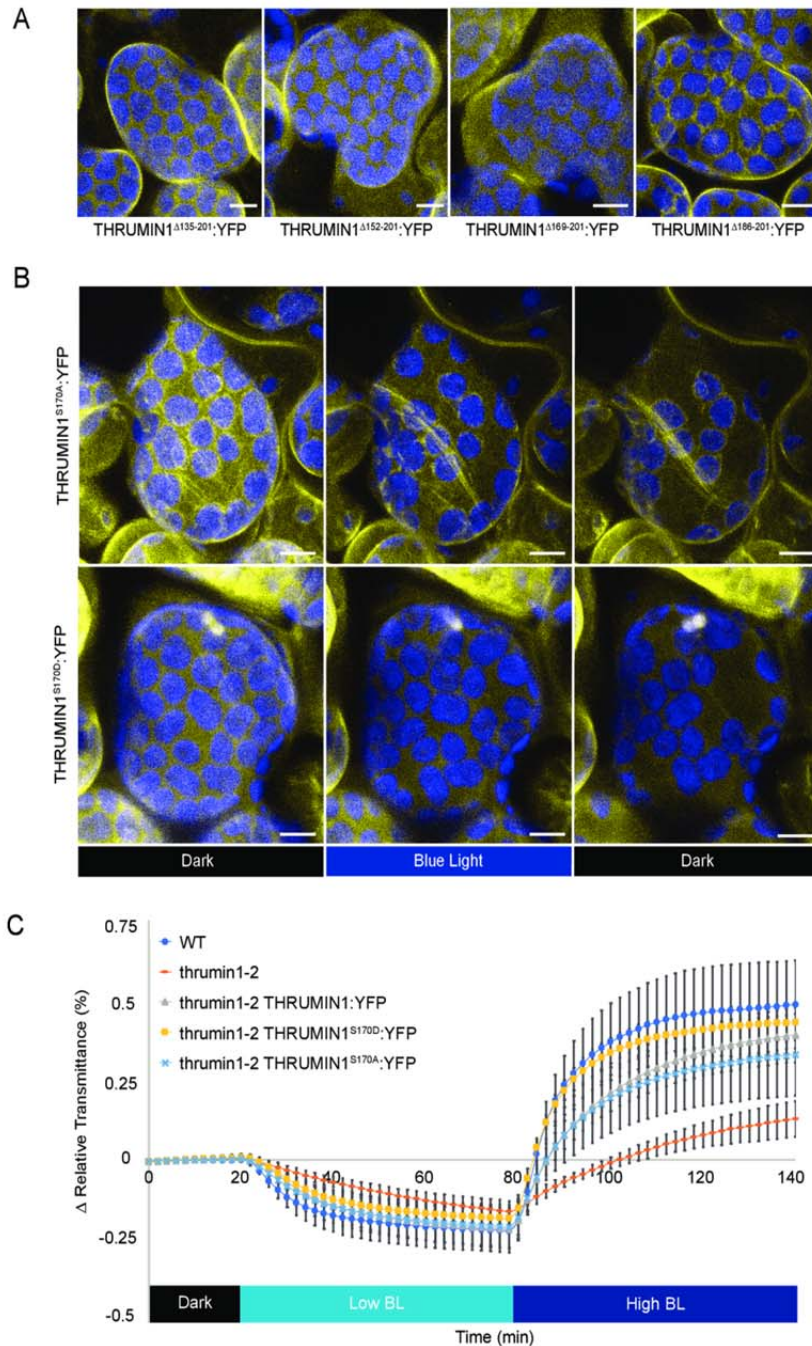

**Figure 5. Phosphomimetic THRUMIN1 at serine 170 disrupted the filamentous localization but conferred wild type chloroplast movements.** (A) Agrobacterium strains containing internal deletion constructs of the IDR were transiently expressed in *N. benthamiana* to test the localization pattern of THRUMIN1:YFP in response to blue light stimulation. Deletion of amino acids 186-201 restored the filamentous localization of THRUMIN1. (B) Serine 170, a putative phosphorylation site between amino acids 169 and 186, was mutated to alanine or aspartic acid to mimic a non-phosphorylatable or constitutively phosphorylated residue, respectively. Transient expression of 35S:THRUMIN1<sup>S170D</sup>:YFP in *N. benthamiana* disrupted the filamentous localization of THRUMIN1 while 35S:THRUMIN1<sup>S170A</sup>:YFP did not. Representative time-lapse images are shown for dark treatment (514nm for YFP excitation), blue light stimulation (470nm and 514nm), and then dark again. The scale bar indicates a 5  $\mu$ m distance. (C) Leaf transmittance assays testing the response to low and high blue light of Col-0 wild type, *thrumin1-2* mutant, 35S:THRUMIN1<sup>S170A</sup>:YFP rescue transgenic, and the 35S:THRUMIN1<sup>S170D</sup>:YFP rescue transgenic. Both mutant transgenic genotypes exhibited wild type chloroplast movements. After establishment of the baseline level of leaf light transmittance after dark acclimation, chloroplast movement was induced by treatment with low blue light ( $\sim 2 \mu\text{mol m}^{-2}\text{s}^{-1}$ ) followed by high blue light intensity ( $\sim 100 \mu\text{mol m}^{-2}\text{s}^{-1}$ ). Standard deviation error bars represent the variance in transmittance values for 8-12 individual plants per genotype.

195 actin localization when transiently expressed in *N. benthamiana*. Confocal microscopy

196 revealed that the chloroplast-associated filamentous localization of THRUMIN1:YFP  
197 was disrupted in THRUMIN1<sup>Δ135-201</sup>:YFP, THRUMIN1<sup>Δ152-201</sup>:YFP, and THRUMIN1<sup>Δ169-</sup>  
198 <sup>201</sup>:YFP deletion mutants. However, the deletion mutant THRUMIN1<sup>Δ186-201</sup>:YFP showed  
199 normal filamentous localization (Fig. 5A). Those results indicated that localization of  
200 THRUMIN1 to cp-actin filaments resided between amino acids 169 through 186 and  
201 suggested that serine 170 may be a phosphorylation site. When a serine 170 to aspartic  
202 acid mutant form of THRUMIN1 was transiently expressed in *N. benthamiana* leaf cells,  
203 it failed to localize to filaments and conferred a more diffuse localization phenotype with  
204 or without whole-field blue light (Fig. 5B, Supplemental Movie S7). Diffuse localization of  
205 the THRUMIN1<sup>S170D</sup>:YFP mutant transgene was also observed with or without whole-  
206 field blue light when stably expressed in *A. thaliana thrumin1-2* mutant plants  
207 (Supplemental Movie S8). However, THRUMIN1<sup>S170D</sup>:YFP rescued the defective  
208 chloroplast movement phenotype in the *thrumin1-2* mutant plants (Fig. 5C,  
209 Supplemental Movie S8). When a non-phosphorylatable THRUMIN1<sup>S170A</sup>:YFP mutant  
210 was expressed in *N. benthamiana* and in the *A. thaliana thrumin1-2* mutant background,  
211 the protein showed both wild-type filament localization and chloroplast movements in  
212 response to whole-field blue light (Fig. 5B-C, Supplemental Movies S9 and S10). We  
213 were not able to detect any phosphopeptides associated with serine 170 with mass  
214 spectrometry analysis of THRUMIN1:YFP in transgenic *A. thaliana* in light or dark  
215 conditions (Supplemental Excel). These observations provide the first evidence we are  
216 aware of to suggest that THRUMIN1 localization to filamentous actin may not be  
217 required to achieve normal chloroplast movements.  
218

219 **Serine 113, 115, and 164 phosphorylation status do not disrupt THRUMIN1:YFP**  
220 **localization to F-actin**

221 Boex-Fontvieille et al. (2014) found that THRUMIN1 was more phosphorylated in  
222 the dark and phosphorylation mutants of THRUMIN1 serine 113, 115, and 164 showed  
223 that a THRUMIN1<sup>S113/115/164A</sup> triple alanine mutant failed to rescue the chloroplast  
224 movement defects in *thrumin1-2* mutant plants. The constitutively phosphorylated form  
225 of that mutant (THRUMIN1<sup>S113/115/164D</sup>) however, partially rescued the *thrumin1-2* mutant  
226 phenotype suggesting a reliance on a balance in phosphorylation dynamics of those  
227 sites in the light vs. dark states of THRUMIN1. When we transiently expressed YFP-  
228 tagged versions of those mutant constructs in *N. benthamiana*, neither  
229 THRUMIN1<sup>S113/115/164A</sup>:YFP nor THRUMIN1<sup>S113/115/164D</sup>:YFP disrupted THRUMIN1's F-  
230 actin localization (Fig. 6A). Moreover, when we conducted chloroplast movement  
231 assays in *A. thaliana thrumin1-2* mutant plants expressing the  
232 THRUMIN1<sup>S113/115/164A</sup>:YFP transgene, we found that it rescued the chloroplast  
233 movement phenotype (Fig. 6B). Our results suggest that if phosphorylation of serine  
234 113, 115, and 164 regulates THRUMIN1 activity, it may involve a complicated balance  
235 of phosphorylation states among those residues, possibly also involving serine 170 (Fig.  
236 1) and/or other previously unannotated phosphorylation sites.

237

238 **Serine 146 is required for actin filament and plasma membrane localization of**  
239 **THRUMIN1 in tobacco**

240 To further examine the phosphorylation status of THRUMIN1, *A. thaliana* plants  
241 expressing the THRUMIN1:YFP transgene were treated with blue light to induce



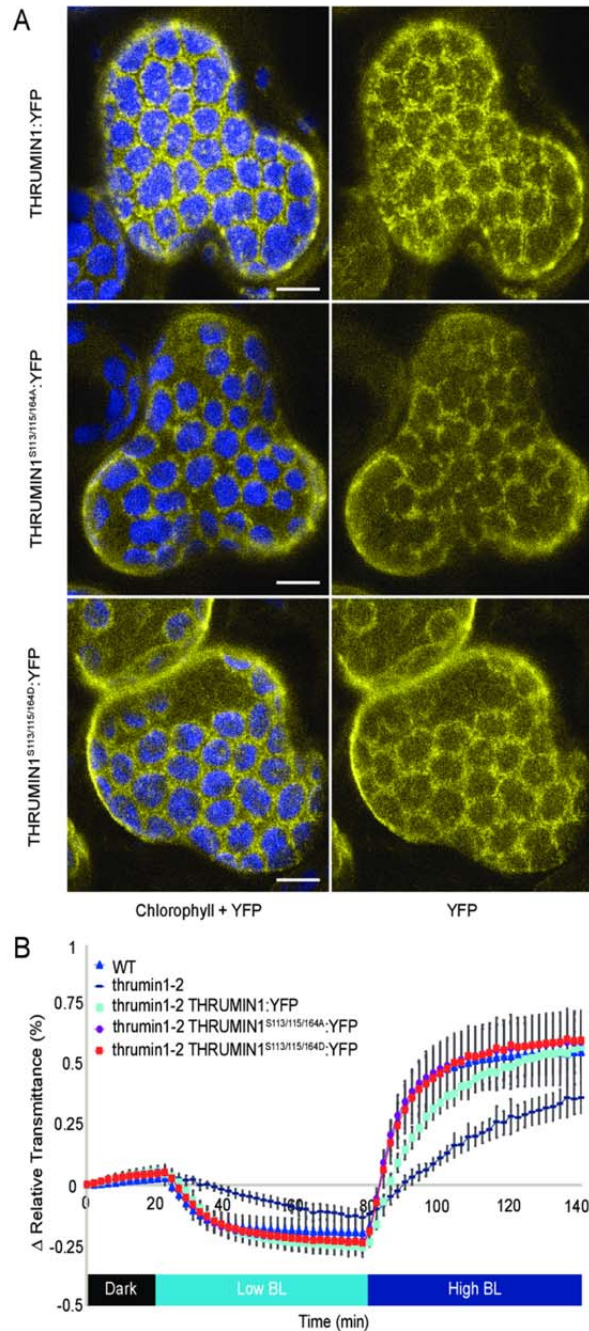

**Figure 6. Constitutively phosphorylated and dephosphorylated THRUMIN1 at serine 113, 115, and 164 did not disrupt wild type THRUMIN1 localization or chloroplast movements.** (A) Localization phenotypes of wildtype 35S::THRUMIN1::YFP and phosphorylation mutants 35S::THRUMIN1<sup>S113/115/164A</sup>::YFP and 35S::THRUMIN1<sup>S113/115/164D</sup>::YFP via transient expression in *N. benthamiana*. Both transgenic mutant plant lines phenocopied the wild type protein localization. The scale bar indicates a 5  $\mu$ m distance. (B) Leaf transmittance assays demonstrated the full rescue phenotypes of 35S::THRUMIN1<sup>S113/115/164A</sup>::YFP and 35S::THRUMIN1<sup>S113/115/164D</sup>::YFP lines compared to wildtype 35S::THRUMIN1::YFP. After establishment of the baseline level of leaf light transmittance after dark acclimation, chloroplast movement was induced by treatment with low blue light ( $\sim 2 \mu\text{mol m}^{-2}\text{s}^{-1}$ ) followed by high blue light intensity ( $\sim 100 \mu\text{mol m}^{-2}\text{s}^{-1}$ ). Standard deviation error bars represent the variance in transmittance values for 8-12 individual plants per genotype.

242 chloroplast movement and THRUMIN1 activity. Proteins were extracted and the



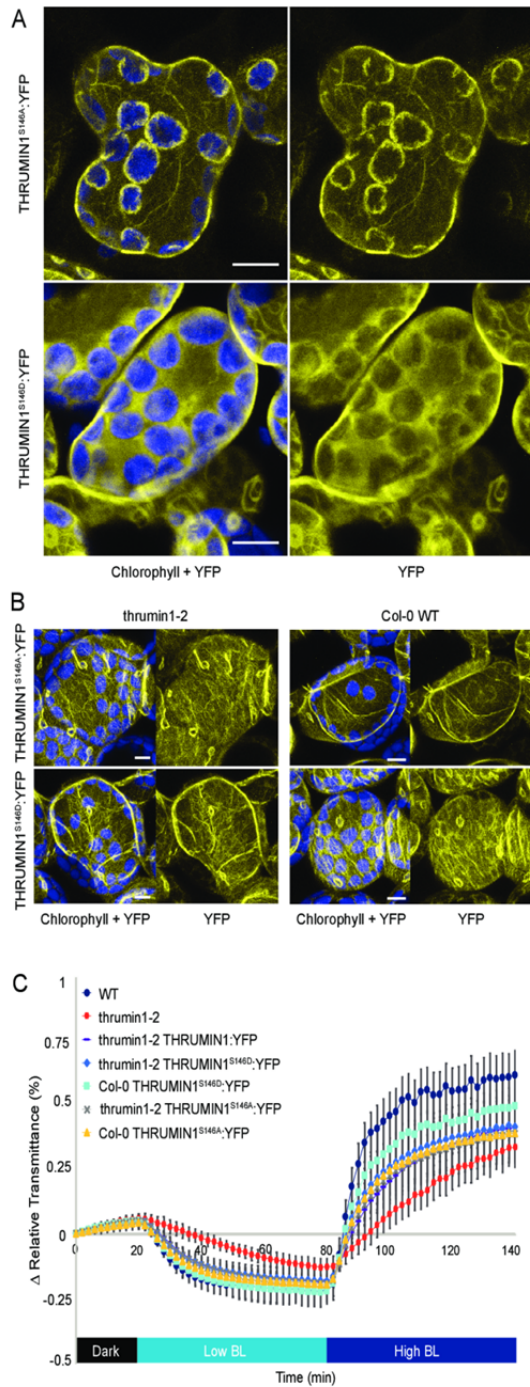

**Figure 7. Phosphorylation mutants for THRUMIN1 displayed altered localization in *N. benthamiana* but not *A. thaliana*.** (A) 35S:THRUMIN1<sup>S146A</sup>;YFP and 35S:THRUMIN1<sup>S146D</sup>;YFP transiently expressed in *N. benthamiana* showed filamentous and cytoplasmic localization, respectively. (B) However, in *A. thaliana*, 35S:THRUMIN1<sup>S146A</sup>;YFP and 35S:THRUMIN1<sup>S146D</sup>;YFP expressed in the *thrum1-2* mutant background and Col-0 WT background displayed wild type localization patterns. The scale bar indicates a 5  $\mu$ m distance. (C) Leaf transmittance assays of the mutant transgenic lines confirmed wild type chloroplast movements relative to the 35S:THRUMIN1:YFP rescue line. After establishment of the baseline level of leaf light transmittance after dark acclimation, chloroplast movement was induced by treatment with low blue light ( $\sim 2 \mu\text{mol m}^{-2}\text{s}^{-1}$ ) followed by high blue light intensity ( $\sim 100 \mu\text{mol m}^{-2}\text{s}^{-1}$ ). Standard deviation error bars represent the variance in transmittance values for 8-12 individual plants per genotype.

243 THRUMIN1:YFP protein was immunoprecipitated with GFP-conjugated agarose beads

244 for mass spectrometry (MS) analysis. MS analysis revealed serine 146 and threonine  
245 104 as two new phosphorylation sites and confirmed phosphorylation at serine 113,  
246 115, and 164. Both serine 146 and threonine 104 were mutated to phosphomimetic  
247 (aspartic acid) or non-phosphorylatable (alanine) forms. When transiently expressed in  
248 *N. benthamiana* leaf cells, mutations to threonine 104 did not alter the localization of  
249 THRUMIN1 in either the constitutively on or off forms (Supplemental Fig. S2). However,  
250 the phosphomimetic THRUMIN1<sup>S146D</sup>:YFP displayed cytoplasmic localization rather than  
251 wild-type filamentous protein localization, suggesting phosphorylation of serine 146 is  
252 involved in THRUMIN1 association with actin filaments as well as the plasma  
253 membrane (Fig. 7A, Supplemental Movie S11). In contrast, transient expression of  
254 THRUMIN1<sup>S146A</sup>:YFP localized strongly to cp-actin filaments and display biased  
255 localization away from cortical actin filaments (Fig. 7A, Supplemental Movie S12).  
256 However, the same transgenes expressed in *A. thaliana* did not confer these actin  
257 localization phenotypes (Fig. 7B). In addition, THRUMIN1<sup>S146D</sup>:YFP and  
258 THRUMIN1<sup>S146A</sup>:YFP were both able to rescue chloroplast movements in the *A. thaliana*  
259 *thrumin1-2* mutant background as shown by leaf transmittance assays (Fig. 7C). When  
260 the same transgenes were expressed in the Col-0 WT, wild-type localization with actin  
261 filaments was also observed indicating that the tobacco phenotype was not due to  
262 competition with the tobacco THRUMIN1 homolog (Fig. 7B). The different results  
263 observed in *N. benthamiana* and *A. thaliana* suggest that if serine 146 plays a role, it  
264 may do so in conjunction with other sites within THRUMIN1 or that it requires an  
265 unidentified factor that differs between the two species.  
266

267 **THRUMIN1 associates with 14-3-3 proteins KAPPA and OMEGA in**  
268 **phosphorylation-dependent manners**

269 Preliminary yeast-2-hybrid experiments in our lab indicated that THRUMIN1  
270 interacted with 14-3-3 KAPPA. Our mass spectrometry experiments to assess the  
271 phosphorylation status of THRUMIN1 also led to immunoprecipitation of KAPPA with  
272 THRUMIN1. Since 14-3-3 proteins typically bind to phosphorylated residues to confer a  
273 signal (Tzivion et al., 2001), we hypothesized that KAPPA associates with one or more  
274 of the known phosphorylation sites on THRUMIN1. Co-immunoprecipitation (Co-IP)  
275 assays using non-phosphorylatable THRUMIN1 variants revealed a loss of KAPPA  
276 association when both serine 113 and 115 were mutated to alanine. Additionally,  
277 KAPPA association with THRUMIN1 was lost when the phosphomimetic mutant  
278 THRUMIN1<sup>S113/115D</sup> was used as bait (Fig. 8A). Because constitutively phosphorylated  
279 or dephosphorylated states of serine 113 and 115 interfered with the ability of KAPPA to  
280 associate with THRUMIN1, the sites likely work dynamically.

281 When THRUMIN1<sup>S113/115A</sup>:YFP was expressed in *A. thaliana*, there was no  
282 obvious change in the localization of THRUMIN1 with actin filaments or chloroplast  
283 movement (Fig. 8B-C). In addition, expression of THRUMIN1<sup>S113/115D</sup>:YFP in the  
284 *thrumin1-2* mutant fully rescued the chloroplast movement phenotype and displayed  
285 localization with actin filaments (Fig. 8B-C). Our mass spectrometry experiments had  
286 also pulled down 14-3-3 OMEGA with THRUMIN1 and we found that the 14-3-3  
287 OMEGA association is also dependent on the phosphorylation status of serine 113 and  
288 115 (Fig. 8D). To test whether the THRUMIN1-KAPPA and THRUMIN1-OMEGA  
289 relationships were specific among the many 14-3-3 proteins, Co-IP assays were

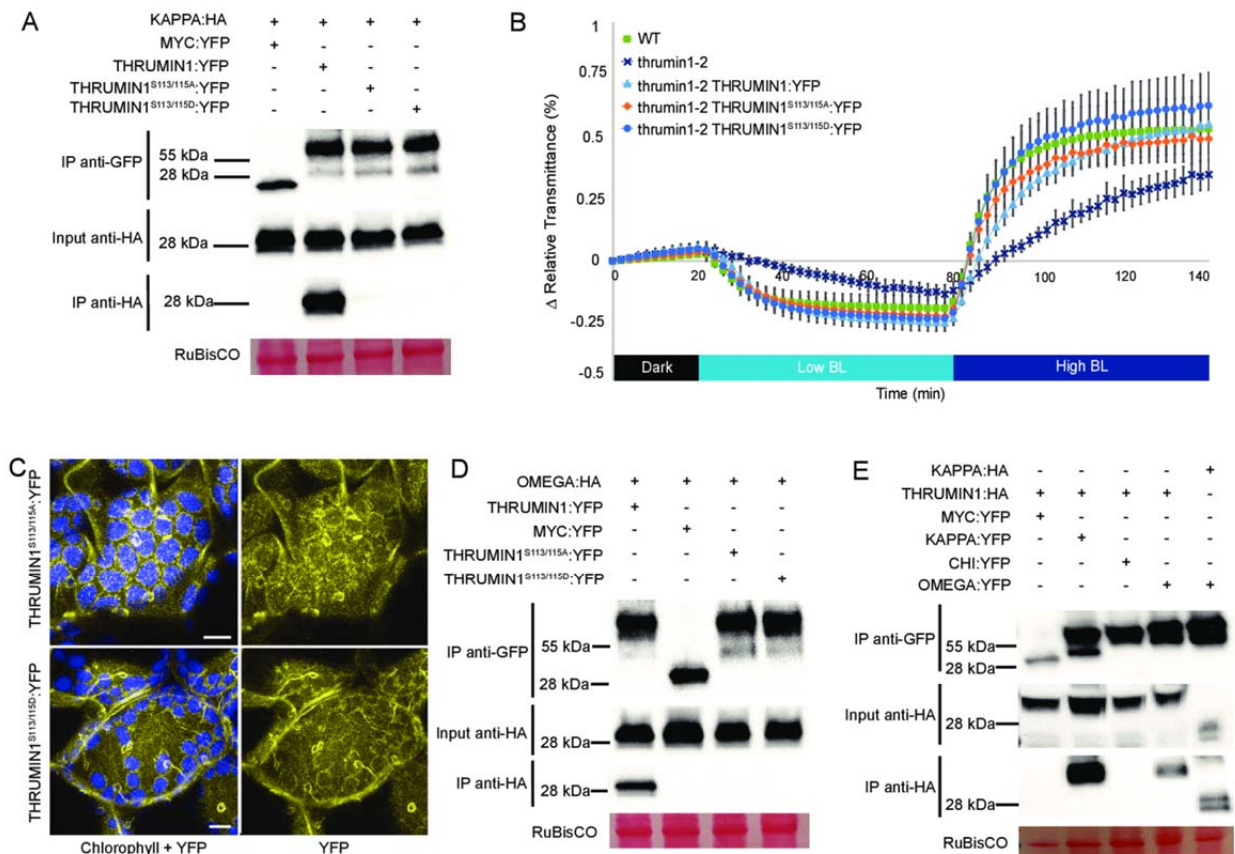

**Figure 8. THRUMIN1 associates with 14-3-3 KAPPA and OMEGA in phosphorylation-dependent manners.** (A) THRUMIN1 phosphorylation mutants THRUMIN1<sup>S113/115A</sup>:YFP and THRUMIN1<sup>S113/115D</sup>:YFP were transiently expressed under the 35S viral promoter in *N. benthamiana* and did not co-immunoprecipitate with 35S:KAPPA:HA. Wild type 35S:THRUMIN1:YFP was used as a positive control and 35S:MYC:YFP was used as a negative control. (B) Leaf transmittance assays of THRUMIN1<sup>S113/115A</sup>:YFP and THRUMIN1<sup>S113/115D</sup>:YFP transgenic plants in the *thrumin1-2* rescue background exhibited wild type chloroplast movements and (C) localization patterns. After establishment of the baseline level of leaf light transmittance after dark acclimation, chloroplast movement was induced by treatment with low blue light (~2  $\mu$ mol m<sup>-2</sup>s<sup>-1</sup>) followed by high blue light intensity (~100  $\mu$ mol m<sup>-2</sup>s<sup>-1</sup>). Standard deviation error bars represent the variance in transmittance values for 8-12 individual plants per genotype. For the micrographs, chlorophyll autofluorescence is false-colored blue and the YFP channel is separated. The scale bar indicates a 5  $\mu$ m distance. All of the THRUMIN1 constructs were under control of 35S promoter. (D) Mass spectrometry analysis revealed the association of 14-3-3 OMEGA with THRUMIN1 leading to validation by in vivo co-immunoprecipitation in *N. benthamiana*. 14-3-3 OMEGA also bound to THRUMIN1 in a phosphorylation-dependent manner using the same serine 113 and 115 transgenic mutants as bait. (E) To verify 14-3-3 specificity, a co-immunoprecipitation assay using a different 14-3-3 protein fused with YFP as bait, 14-3-3 CHI, was tested for THRUMIN1 association in *N. benthamiana*. 35S:MYC:YFP served as a negative control while 35S:KAPPA:YFP served as a positive control. 35S:THRUMIN1:HA associates with 35S:KAPPA:YFP and 35S:OMEGA:YFP, but not 35S:CHI:YFP. 35S:OMEGA:YFP and 35S:KAPPA:HA demonstrated a typical 14-3-3 heterodimerization. All protein samples were extracted 48 hours post-infiltration. Ponceau-S stain was used as a loading control for total protein as demonstrated by RuBisCO.

290 performed using the 14-3-3 CHI isoform. We found that THRUMIN1:HA associates with  
 291 KAPPA:YFP and OMEGA:YFP, but not CHI:YFP. We also found that OMEGA:YFP and  
 292 KAPPA:HA demonstrated a typical 14-3-3 heterodimerization (Fig. 8E). Although the  
 293 functional relationship of these 14-3-3 proteins with THRUMIN1 remains unclear, they  
 294 may play a role in light-dependent chloroplast movements by providing a scaffold by  
 295 which THRUMIN1 interacts with other chloroplast movement proteins.  
 296

297 **Coordination of putative zinc-binding cysteines is required for light-dependent**  
298 **chloroplast movements and THRUMIN1-actin interactions.**

299 Previous studies in which the C-terminus of THRUMIN1 was truncated showed  
300 that it was necessary for functional chloroplast movement (Whippo et al., 2011). The C-  
301 terminus contains highly conserved clusters of cysteines with canonical zinc-binding  
302 arrangements. To determine if the coordinated cysteines are required for THRUMIN1  
303 function, cysteines 317, 320, 351, and 354 were mutated to alanine to disrupt the  
304 putative zinc-binding capabilities. Analysis of chloroplast movements in the *thrumin1-2*  
305 mutant plants expressing THRUMIN1<sup>C317/320/351/354A</sup>:YFP showed that it was unable to  
306 rescue the *thrumin1-2* mutant, demonstrating the importance for these cysteine  
307 residues in chloroplast movement (Fig. 9A). However, expression of the transgene  
308 resulted in increased localization of THRUMIN1 with cp-actin filaments (Fig. 9B,  
309 Supplemental Movie S13). Upon exposure to blue light, the localization of wild-type  
310 THRUMIN1 to cp-actin typically initially disappeared but then quickly reappeared in a  
311 biased arrangement towards the leading edge of movement (Fig. 2, Supplemental  
312 Movies S1 and S2). Upon blue light exposure of dark-acclimated wild-type plants  
313 expressing THRUMIN1<sup>C317/320/351/354A</sup>:YFP, its localization dynamics were similar to wild-  
314 type with the exception that when the filaments reappeared, they showed a more robust  
315 and uniform arrangement around the entire periphery of the chloroplast in comparison  
316 to the wild-type protein (Fig. 9B, Supplemental Fig. S3A, Supplemental Movie S13).  
317 There was no significant change ( $p=0.0575$ ) in the ratio of  
318 THRUMIN1<sup>C317/320/351/354A</sup>:YFP fluorescence on the leading edge versus the lagging  
319 edge during the subtle chloroplast movements (Supplemental Fig. S3B). The lack of



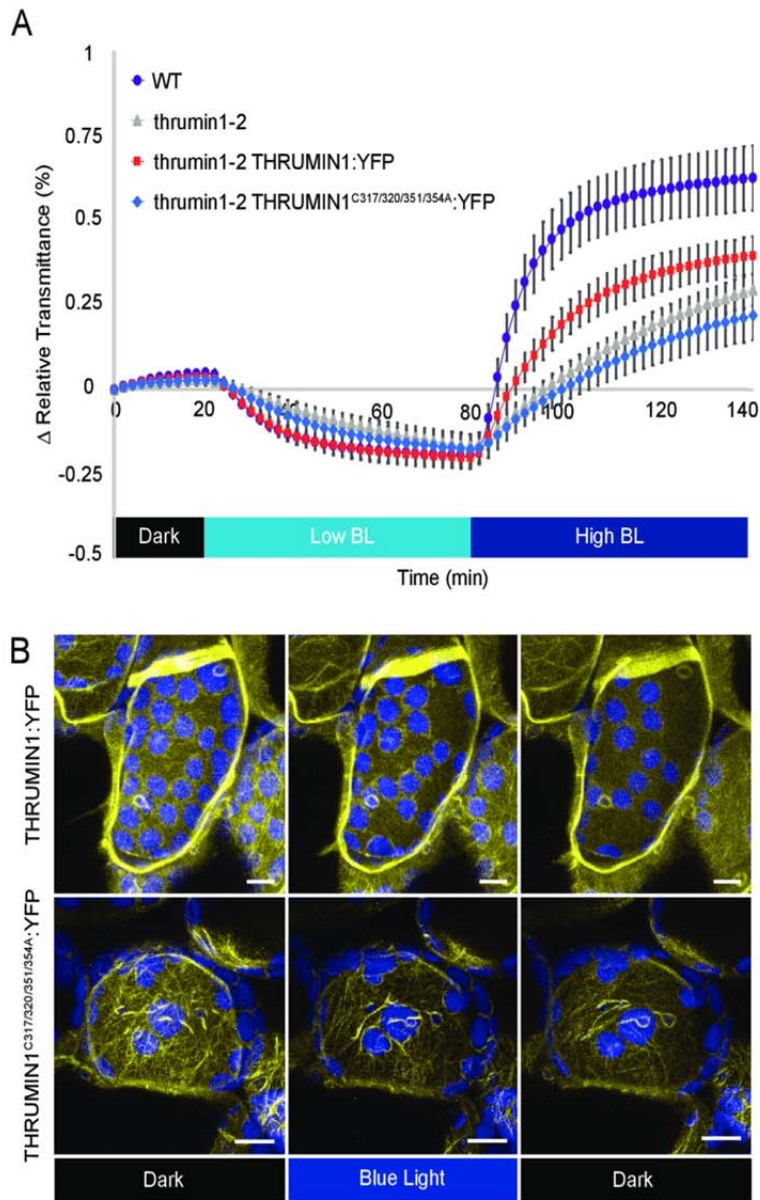

**Figure 9. Conserved cysteine residues regulate THRUMIN1 filament reorganization and proper chloroplast movement.** (A) Plants expressing 35S:THRUMIN1<sup>C317/320/351/354A</sup>:YFP in the *thrumin1-2* mutant background phenocopied the defective chloroplast movements assayed by leaf transmittance. After establishment of the baseline level of leaf light transmittance after dark acclimation, chloroplast movement was induced by treatment with low blue light (~2  $\mu\text{mol m}^{-2}\text{s}^{-1}$ ) followed by high blue light intensity (~100  $\mu\text{mol m}^{-2}\text{s}^{-1}$ ). Standard deviation error bars represent the variance in transmittance values for 8-12 individual plants per genotype. (B) 35S:THRUMIN1<sup>C317/320/351/354A</sup>:YFP expressed in *thrumin1-2* mutant plants displayed filamentous localization in a dominant-negative manner. In response to blue light, the filaments did not properly rearrange to facilitate effective chloroplast movement thus giving overall slower net movement. Representative time-lapse images are shown for dark treatment (514nm for YFP excitation), blue light stimulation (470nm and 514nm), and then dark again. Chlorophyll autofluorescence is false-colored blue and the YFP channel is false-colored yellow. The scale bar indicates a 5  $\mu\text{m}$  distance.

320 biased relocalization and the inability of THRUMIN1<sup>C317/320/351/354A</sup>:YFP to rescue normal

321 chloroplast movements adds additional support to models (Kong et al., 2013) that  
322 involve a role of biased positioning of cp-actin in regulating chloroplast movement.  
323  
324

## 325 Discussion

326 We have conducted site-directed mutagenesis studies to obtain further insights  
327 into how the IDR associates with actin filaments in a light-dependent manner and to  
328 determine whether the THRUMIN1-actin association was directly involved in facilitating  
329 chloroplast movements. Previous work showed that the actin-binding activity of  
330 THRUMIN1 resided in the N-terminal IDR of THRUMIN1 (Whippo et al., 2011). A  
331 predicted WASP Homology-2 (WH2) domain was identified within the IDR suggesting it  
332 may be where THRUMIN1 interacts with actin filaments (Fig. 1). However, deletion of  
333 the putative WH2 domain and mutations of conserved amino acids in the WH2 domain  
334 did not disrupt the localization of THRUMIN1 to actin filaments (Fig. 4B-C). This may be  
335 because more than one WH2 domain is usually required to form actin bundles in  
336 conjunction with coordination from other actin-binding motifs (Loomis et al., 2006) or  
337 that post-translational modifications or other protein-protein associations are involved.  
338 Examination of truncations within the IDR of the full-length protein revealed a peptide  
339 region critical for the filamentous localization of THRUMIN1 (Fig. 5A) and led us to  
340 examine a putative phosphorylation site (serine 170) in that region of the protein. When  
341 serine 170 was changed to aspartic acid to mimic constitutive phosphorylation, the  
342 normal filamentous localization of THRUMIN1 was disrupted and THRUMIN1 displayed  
343 a diffuse localization pattern (Fig. 5B). However, our mass spectrometry analysis did not  
344 reveal any phosphopeptides associated with serine 170 suggesting that phosphorylation  
345 of serine 170 was too labile for our protein analysis or that the impact of this mutation  
346 may be the result of a structural change that alters the folding of the IDR interfering with  
347 THRUMIN1's ability to bind to actin filaments. That *thrumin1-2* mutant plants expressing



348 THRUMIN1<sup>S170D</sup>:YFP exhibited normal chloroplast movements (Fig. 5C) without  
349 showing localization to actin filaments was unexpected since all previous studies with  
350 THRUMIN1 and *thrumin1* mutant plants showed a close correlation between light-  
351 dependent THRUMIN1-actin interactions and chloroplast movement. These new results  
352 therefore suggest that the THRUMIN1 actin-bundling activity may not be directly  
353 involved in chloroplast movement.

354

355 Light-dependent phosphorylation of THRUMIN1 and several proteins involved in  
356 chloroplast movement (Boex-Fontvieille et al., 2014) along with the fact that the  
357 phototropins are kinases strongly suggests involvement of phosphorylation in regulating  
358 chloroplast movement. Indeed, Boex-Fontvieille et al. (2014) showed that expression of  
359 THRUMIN1 containing non-phosphorylatable alanine mutations to three  
360 phosphorylation sites that they had identified (S113, S115, S164) failed to rescue the  
361 *thrumin1-2* chloroplast movement mutant phenotype. However, when we created the  
362 same construct fused with YFP to understand how these mutations would affect the  
363 localization activity of THRUMIN1, we found no disruption to the light-induced actin-  
364 bundling characteristics (Fig. 6A) and that the mutant transgene was able to rescue the  
365 chloroplast movement defects in *thrumin1-2* mutant plants (Fig. 6B). To better assess  
366 the phosphorylation of THRUMIN1, we conducted mass spectroscopy analyses of  
367 immunoprecipitated THRUMIN1:YFP and identified phosphopeptides that contained  
368 threonine 104 and serine 146. Mutation of those amino acids to non-phosphorylatable  
369 and phosphomimetic amino acids showed that threonine 104 did not alter chloroplast  
370 movements or actin-localization with either mutated form (Supplemental Fig. S2) but

371 mutation of serine 146 to aspartic acid completely abrogated the light-induced bundling  
372 activity of THRUMIN1:YFP (Fig. 7A). Unlike the THRUMIN1<sup>S170D</sup>:YFP localization, it  
373 appeared to confer a cytoplasmic localization since time-lapse confocal microscopy  
374 showed vacuolar movements in the YFP channel, which is a hallmark of cytoplasmic  
375 localization (Fig. 7A, Supplemental Movie S11). This suggests that the phosphomimetic  
376 mutation at serine 146 may in some way interfere with insertion of THRUMIN1 into the  
377 plasma membrane, possibly by affecting the N-myristoylation and S-palmitoylation  
378 groups. If so, this suggests that THRUMIN1 may be able to move between plasma  
379 membrane-localized and cytoplasmic populations. Also, because serine 146 resides  
380 close to the putative WH2 domain, it may influence the activity of the WH2 domain even  
381 though the truncations and mutations we made to the WH2 domain did not disrupt the  
382 typical THRUMIN1-actin localization. However, the results we observed in *N.*  
383 *benthamiana* differed from what we observed in *A. thaliana* where the transgenic plants  
384 did not confer abnormal localization of THRUMIN1 (Fig. 7B). The different results in the  
385 two species may indicate differences in how THRUMIN1 is regulated in the two model  
386 plants.

387

388         Because phosphorylation plays a critical role in the localization pattern of  
389 THRUMIN1, it is likely that proteins other than actin associate with THRUMIN1 to  
390 regulate its light-dependent function. 14-3-3 proteins are known to bind to  
391 phosphorylated targets and modulate the function of the protein. In addition, the 14-3-3  
392 LAMBDA isoform was previously found to bind to Phototropin2 and to regulate blue  
393 light-induced stomatal opening responses via phosphorylation (Tseng et al., 2012).

394 Although 14-3-3 LAMBDA did not have a significant effect on chloroplast movements, *A.*  
395 *thaliana* has 13 isoforms of 14-3-3 proteins suggesting the potential for a network of  
396 functions and/or redundancies (Rosenquist et al., 2000; DeLille et al., 2001).

397  
398 The multiplicity of 14-3-3 isoforms make's it challenging to use genetic  
399 approaches to identify individual functions of each 14-3-3 protein. In preliminary studies,  
400 we observed that 14-3-3 KAPPA interacts with THRUMIN1 via yeast-two-hybrid assays  
401 and the association was confirmed via *in vivo* co-immunoprecipitation of  
402 THRUMIN1:YFP expressed *N. benthamiana* (Fig. 8A). T-DNA insertions in the *KAPPA*  
403 locus did not cause any defects in low and high light chloroplast movements,  
404 presumably due to redundant function of other 14-3-3 proteins (Tseng et al., 2012). In  
405 this study, we identified a 14-3-3 recognition motif in THRUMIN1 that includes serine's  
406 113 and 115 and immunoprecipitation studies showed that changing serine 113 and  
407 115 to either an alanine or aspartic acid disrupted the association with KAPPA and  
408 OMEGA (Fig. 8A, D) suggesting a role of serine 113 and 115 in facilitating dynamic  
409 protein-protein associations through combinatorial phosphorylation dynamics rather  
410 than a simple on or off change of a specific phosphorylation state. Our finding that 14-3-  
411 3 KAPPA and OMEGA both associated with THRUMIN1 *in vivo* suggests that they may  
412 provide scaffolding for THRUMIN1 to interact with other chloroplast movement proteins.

413  
414 The cysteine-rich region in the C-terminus of THRUMIN1 was previously shown  
415 to be required for functional chloroplast movements (Whippo et al., 2011). Cysteines in  
416 that region of THRUMIN1 show canonical arrangements typical for coordination with

417 zinc molecules (Pace and Weerapana, 2014) and suggested the cysteine clusters may  
418 be needed for proper chloroplast movement by conferring structure, facilitating protein-  
419 protein interactions, and/or playing a regulatory role. When several of the clustered  
420 cysteines were mutated to alanine's, we saw that these sites are necessary for  
421 THRUMIN1 to undergo light-induced changes in its filamentous localization and proper  
422 chloroplast movements (Fig. 9A-B, Supplemental Fig. S3, Supplemental Movie S13).  
423 When expressed in the *A. thaliana thrumin1-2* mutant, we observed that the transgene  
424 interfered with the polar organization of filaments normally seen near the leading edge  
425 of moving chloroplasts (Fig. 9B, Supplemental Fig. S3, Supplemental Movie S13). The  
426 resulting localization of THRUMIN1 around the entire periphery instead of just near the  
427 leading edge normally seen in response to blue light suggests that controlled anchoring  
428 of chloroplasts to the plasma membrane via THRUMIN1 may be important for regulating  
429 their movement in response to blue light.

430  
431 In addition to our site-directed mutagenesis work, we also used expression of the  
432 stroma-localized tpFNR:YFP probe to obtain additional insight into how the chloroplast  
433 outer envelope behaves in relation to light-dependent chloroplast movements. The  
434 contrast between the YFP signal and chloroplast autofluorescence allowed us to  
435 observe that highly dynamic, pseudopod-like protrusions of the chloroplast envelope  
436 associated with chloroplast movements (Fig. 3A,C, and Supplemental Movies S3 and  
437 S4). Consistent with Kong et al (2013), we observed that in wild-type *A. thaliana*, the  
438 chloroplast envelope protruded more in the direction that chloroplasts were moving  
439 (Supplemental Movie S3 and S4). However, *thrumin1-2* mutant plants expressing

440 tpFNR:YFP did not develop significant protrusions of the chloroplast envelope and  
441 moved in more sporadic jumps compared to wild-type plants (Fig. 3B,C, Supplemental  
442 Movies S5 and S6). Since THRUMIN1 appears to localize along the leading edge  
443 during movement (Fig. 2, Supplemental Fig. S1, Supplemental Movies S1 and S2) our  
444 observations with tpFNR:YFP suggest that THRUMIN1 may function in bridging the  
445 chloroplast membrane to the plasma membrane and may be important for providing a  
446 footing for cp-actin dynamics to develop a motive force. The time-lapse movies of the  
447 membrane protrusions in moving chloroplasts seem to suggest a pulling mechanism but  
448 actin dynamics are generally involved in development of a pushing force. Because cp-  
449 actin is cytoplasmic and attached to the chloroplast envelope via CHLOROPLAST  
450 UNUSUAL POSITIONING1 (CHUP1) (Oikawa et al., 2003; Oikawa et al., 2008; Schmidt  
451 von Braun and Schleiff, 2008; Kadota et al., 2009), the cp-actin may anchor to the  
452 plasma membrane slightly over the chloroplast so that as the cp-actin grows away from  
453 CHUP1 on the chloroplast envelope, it can push against the plasma membrane.  
454 Although more work is needed to determine the nature of the motive force, the stroma-  
455 localized tpFNR:YFP could be a useful new tool for that work.

456

457         Current models for light-dependent chloroplast movement suggest that light  
458 activation causes cp-actin to form on the leading edge of the chloroplast and that the  
459 cp-actin in some way provides a motive force for movement via dynamic changes of the  
460 cp-actin filaments (Kadota et al., 2009; Kong et al., 2013). THRUMIN1 is a plasma  
461 membrane-localized protein that is required for normal light-induced chloroplast  
462 movements and binds to and can bundle F-actin (Whippo et al., 2011). Moreover, wild-

463 type THRUMIN1:YFP has been found to localize with cp-actin in leaf mesophyll cells in  
464 a light-dependent manner and has led us and others to suggest it plays a role in motive  
465 force dynamics (Whippo et al., 2011; Kong et al., 2013). In this study we found that  
466 mutating serine 146 and serine 170 to aspartic acid disrupted THRUMIN1-actin filament  
467 localization but did not seem to interfere with chloroplast movement dynamics (Figs. 5,  
468 7 and Supplemental Movies S7, S8, S11) suggesting that THRUMIN1's interaction with  
469 cp-actin may not be directly associated with the motility mechanism as previously  
470 thought. Furthermore, mutations in the C-terminal cysteine residues resulted in the loss  
471 of THRUMIN1's normal polar localization at the leading edge of cp-actin filaments after  
472 blue light exposure and instead relocalized to cp-actin around the entire chloroplast  
473 periphery to disrupt chloroplast movements (Fig. 9, Supplemental Fig. S3,  
474 Supplemental Movie S13). Also, in the *thrumin1-2* mutant, chloroplasts exhibit sporadic  
475 jumps of movement without any discernable chloroplast protrusions of the chloroplast  
476 envelope (Supplemental Movies S5 and S6) instead of the more sustained movements  
477 and envelope protrusions seen in wild-type leaf cells (Supplemental Movies S3 and S4).  
478 Taken together, these findings lead us to propose that THRUMIN1 functions more to  
479 anchor chloroplasts to the plasma membrane rather than regulating the motive force for  
480 chloroplast movements. The initial detachment of THRUMIN1 from cp-actin may thus  
481 function to release the chloroplasts so that they can move via cytoplasmic streaming, or  
482 another motive force. Upon moving, reorganization of the THRUMIN1-actin association  
483 along the leading edge may then serve to reattach the chloroplast to the plasma  
484 membrane and guide the path of movement through its interactions between cp-actin  
485 and the plasma membrane.

486

487

488 **Materials and Methods:**

489 **Growth Conditions:**

490 All seeds were surface sterilized with 19:1 87.5% ethanol 30% H<sub>2</sub>O<sub>2</sub>. After drying, the  
491 seeds were plated in Petri dishes on ½ MS salts and 0.6% agar and cold stratified for 3-  
492 days at 4°C. The stratified seeds were then grown for 10 days under ~100 μmol m<sup>-2</sup>s<sup>-1</sup>  
493 white light in growth chambers with 12-hour photoperiods at 23°C then transplanted to  
494 fertilized (20-20-20) potting mix (PromixB) and grown under ~120 μmol m<sup>-2</sup>s<sup>-1</sup> white light  
495 and a 12-hour photoperiod. The same process was used for transgenic lines except the  
496 ½ MS media contained 30 mg/mL BASTA (glufosinate ammonium; Cayman Chemical)  
497 for selection of the transgenic plants.

498

499 **Site-directed mutagenesis and deletion constructs:**

500 Site-directed mutations of the phosphorylation sites were created using similar methods  
501 as the Quickchange® II XL kit from Agilent technologies by using the primers listed  
502 below to recreate the whole vector via PCR with the new mutation in place. The primers  
503 with either aspartic acid or alanine substitutions were used to amplify the mutated  
504 version of THRUMIN1 using the Gateway vector pBSDONR P1P4 backbone (Qi et al.,  
505 2012). Error-free sequences were recombined into the pEG100 plant expression vector  
506 (Earley et al., 2006) with a pBSDONR P4rP2 YFP clone using LR Clonase II (Invitrogen,  
507 Carlsbad, CA, USA) to create a final destination vector to be transformed into  
508 *Agrobacterium* strain GV3101. Internal deletion constructs were created using primers  
509 that extend away from the deletion site towards the beginning and end of the gene to  
510 create two PCR fragments which were later fused together through PCR extension



511 (Atanassov et al., 2009). The fused products were recombined into pEG100 in the same  
512 manner as described earlier. The mutant genes were then transformed into *A. thaliana*  
513 Col-0 and *thrumin1-2* (SALK\_027277) backgrounds using the *Agrobacterium*-mediated  
514 floral dip transformation method (Clough and Bent, 1998).

515

### 516 ***Agrobacterium*-mediated Transient Expression**

517 *Agrobacterium* (strain GV3101) carrying the different gene constructs in the pEG100  
518 plant expression vector were cultured in LB media and resuspended in 10mM MgCl<sub>2</sub>  
519 10mM MES pH 5.6 to an OD<sub>600</sub> of 0.2. The solution was incubated for several hours  
520 with 3',5'-Dimethoxy-4'-hydroxyacetophenone (Acetosyringone) to induce virulence and  
521 then injected into *N. benthamiana* leaves. After 48 hours of incubation, leaves were  
522 excised and mounted for imaging the fluorescence of the expressed gene products on a  
523 Leica SP8 scanning confocal microscope using imaging parameters as described  
524 below.

525

### 526 **Live Cell Confocal Microscopy:**

527 Prior to mounting leaf samples on slides, the plants were low-light acclimated for ~3  
528 hours under ~10  $\mu\text{mol m}^{-2}\text{s}^{-1}$  light intensity to facilitate arrangement of the chloroplasts  
529 on the periclinal cell face before imaging. After low-light acclimation, small leaf sections  
530 excised and mounted for imaging and incubated in Perfluoroperhydrophenanthrene  
531 (CAS Number 306-91-2, Millipore/Sigma) to clear out the air spaces and optimize image  
532 resolution. All imaging was acquired using a Leica SP8 Scanning Confocal microscope  
533 with an inverted 40x/1.10 water objective lens. During the first 5 minutes, time-lapse

534 images of YFP fluorescence (525-600 nm) in palisade mesophyll cells were captured at  
535 continuous intervals of ~25 seconds with only YFP excitation using 514nm laser  
536 illumination to prevent activation of the phototropin photoreceptors. The samples were  
537 then exposed for ~15 minutes with whole-field or microbeam blue light stimulation  
538 (470nm) to induce the avoidance response while imaging YFP excitation (514nm). The  
539 blue light treatment was then stopped and the cells were imaged for an additional ~5-10  
540 minutes with 514nm YFP excitation in the absence of blue light stimulation. Throughout  
541 the imaging process, chlorophyll emission was also collected at 650-720nm. In all  
542 cases, the top 12  $\mu\text{m}$  of the palisade mesophyll cell was imaged in 0.42  $\mu\text{m}$  Z-steps.  
543 The images were combined by Z-projection and analyzed using FIJI software.

544

#### 545 **THRUMIN1 Cp-actin Localization Quantification:**

546 To calculate THRUMIN1:YFP fluorescence intensities on the leading edge of the  
547 chloroplast versus the lagging edge, kymographs were generated in Fiji from time-lapse  
548 confocal microscopy movies using a 10 pixel-wide segmented line in the path of  
549 chloroplast movement using the KymographBuilder plugin (created by Hadrien Mary).  
550 THRUMIN1 fluorescence gray values for the leading and lagging edges were then  
551 extracted by tracing a 10 pixel-wide segmented line down the Y-axis of the kymograph.  
552 Distance values (microns) on the kymograph were converted to time from the known  
553 frame rate intervals of the time-lapse movies. The fluorescence values of the leading  
554 edge were then ratioed over the lagging edge. The ratios were averaged from at least  
555 13 chloroplast replicates and were calculated at two minutes before the peak difference,  
556 at the peak, and 2 minutes after the peak. The statistical significance of the difference

557 between the leading and lagging ratios before and after peak chloroplast movement  
558 was assayed by paired two-tailed T-test.

559

#### 560 **Stromal Marker Protrusion Quantification:**

561 Chloroplast membrane protrusion events were identified by the difference between the  
562 fluorescence of the stromal marker, tpFNR:YFP, and the chlorophyll autofluorescence  
563 from confocal time-lapse movies. After a high blue light microbeam irradiation, the  
564 positions of the first chloroplast membrane protrusion at the onset of chloroplast  
565 movement were binned for the leading and lagging edges. Data were obtained from at  
566 least 30 different chloroplasts from 8 different movies.

567

#### 568 **Mass Spectrometry and Co-Immunoprecipitation:**

569 To identify phosphorylation sites, ~3.0 grams of transgenic *A. thaliana* plants expressing  
570 THRUMIN1:YFP were exposed to high-intensity blue light for 10 minutes and flash  
571 frozen in liquid nitrogen. The powdered plant material was mixed with lysis buffer  
572 containing 50 mM Tris-HCl pH 7.5, 150 mM NaCl, 10% Glycerol, 1 mM EDTA, 1%  
573 NP40, and plant protease inhibitor cocktail tablets (Millipore/Sigma; cOmplete™, Mini,  
574 EDTA-free Protease Inhibitor Cocktail; 11836170001) and mixed by rotation using a  
575 tube rotator at 4°C for 30 minutes. The plant lysate was then centrifuged at 10,000xg  
576 and the supernatant added to washed GFP-Trap agarose beads (Chromotek; gta20)  
577 and mixed via tube rotator at 4°C for 3 hours. After incubation with the lysate, the beads  
578 were washed five times with the lysis buffer at 4°C with 1000xg centrifugation to pellet  
579 the beads between washes. The beads were washed with a pre-urea wash buffer (100

580 mM ammonium bicarbonate (ABC), pH 8.0) by resuspending and rotating for 3-5  
581 minutes at 4°C. After the wash, the beads were pelleted at 1000xg and the supernatant  
582 was removed. For protein elution, the beads were resuspended in urea buffer (8M Urea,  
583 100mM ABC pH 8.0) at a 1:1 ratio to the bead volume and incubated for 10-30 min at  
584 room temperature with occasional mild vortex pulsing, pelleted, and the supernatant  
585 (containing eluted protein) saved in a tube. Elution off the beads was repeated two more  
586 times and the combined eluates were submitted for mass spectrometry analysis (see  
587 methods) at the Indiana University Laboratory for Biological Mass Spectrometry facility.  
588  
589 Co-Immunoprecipitation assays were performed similarly to the mass spectrometry  
590 protocol. Samples were extracted from ~0.5 gram of *N. benthamiana* leaves that were  
591 transiently expressing the transgene of interest. Instead of a urea elution, the final  
592 resuspension of the washed beads was in a 1X SDS-loading buffer and boiled at 95°C  
593 for 10 minutes. Samples were centrifuged at 1000xg to pellet the beads and the  
594 supernatant was loaded into a Mini-PROTEAN TGX 4-20% (w/v) gradient gel (Bio-Rad)  
595 to run for 45 minutes at 150V. After SDS-PAGE, the protein was transferred to a  
596 nitrocellulose membrane (GE Lifescience Product #10600003) and stained with  
597 Ponceau-S for validation of protein transfer. The blots were then blocked in 5% skim  
598 milk for at least one hour. For GFP/YFP detection, primary anti-mouse GFP antibody  
599 (Novus Biological; NB600-597) was applied at 1:7500 dilution and incubated overnight  
600 at 4°C with horizontal platform shaking (62 RPM) followed by secondary goat anti-  
601 mouse-HRP antibody (A-10668; Invitrogen) incubation with three 5-minute Tris-Buffered  
602 Saline 0.1% Tween 20 (TBST) washes in-between and after antibody applications. For

603 HA detection, anti-HA-HRP (3F10; Sigma) conjugated antibody was applied at 1:7500  
604 dilution for 1 hour at room temperature. Blots were incubated with Clarity Western ECL  
605 Substrate (#1705061; Bio-Rad) for 5 minutes and imaged using a ChemiDoc Imaging  
606 System to detect chemiluminescence of the blotted proteins.

607

608 For mass spectrometry analysis, tryptic peptides were injected into an Easy-nLC 100  
609 HPLC system coupled to an Orbitrap Fusion Lumosmass spectrometer (Thermo Fisher  
610 Scientific). Specifically, peptide samples were loaded onto an Acclaim PepMap 100 C18  
611 trap column (75  $\mu\text{m}$  x 2 cm, 3  $\mu\text{m}$  bead size with 100  $\text{\AA}$  pores) in 0.1% (v/v) formic acid.  
612 The peptides were separated using an Acclaim PepMap RSLC C18 analytical column  
613 (75  $\mu\text{m}$  x 25 cm, 2  $\mu\text{m}$  bead size with 100  $\text{\AA}$  pores) using an acetonitrile-based gradient  
614 (solvent A: 0% [v/v] acetonitrile and 0.1% [v/v] formic acid; solvent B: 80% [v/v]  
615 acetonitrile and 0.1% [v/v] formic acid) at a flow rate of 300 nL/min. A 30-min gradient  
616 was performed as follows: 0 to 0.5 min, 2 to 8% B; 0.5 to 24 min, 8 to 40% B; 24 to 26  
617 min, 40 to 100% B; 26 to 30 min, 100% B, followed by re-equilibration to 2% B.

618 Electrospray ionization was then performed with a nanoESI source at a 275°C capillary  
619 temperature and 1.9-kV spray voltage. The mass spectrometer was operated in data-  
620 dependent acquisition mode with mass range 400 to 2000 m/z. Precursor ions were  
621 selected for tandem mass spectrometry analysis in the Orbitrap with 3-sec cycle time  
622 using higher energy collisional dissociation at 28% collision energy. The intensity  
623 threshold was set at  $5 \times 10^4$ . The dynamic exclusion was set with a repeat count of 1  
624 and exclusion duration of 30 sec. The resulting data were searched in Protein  
625 Prospector (<http://prospector.ucsf.edu/prospector/mshome.htm>) against the

626 *Arabidopsis* database. Carbamidomethylation of Cys residues was set as a fixed  
627 modification. Protein N-terminal acetylation, oxidation of Met, protein N-terminal Met  
628 loss, pyroglutamine formation, phosphorylation on STY were set as variable  
629 modifications. In total, three variable modifications were allowed. Trypsin digestion  
630 specificity with one missed cleavage was allowed. The mass tolerance for precursor  
631 and fragment ions was set to 10 ppm for both. Peptide and protein identification cutoff  
632 scores were set to 15 and 22, respectively. All phosphopeptide spectra were confirmed  
633 manually to verify peptide identity and site of modification.

634

### 635 **Transmittance Curve Assay**

636 Leaf discs (7mm) were made with a hole punch and placed on a 0.5% agar pad in wells  
637 of clear-bottom 96-well plate (Falcon) sealed with Microseal 'A' film (Bio-Rad). The film  
638 was punctured over each well with a needle to allow for gas exchange. The prepared  
639 plates were dark-acclimated for a minimum of 6 hours before placement in a BioTek  
640 Cytation 3 Imaging Reader. The baseline level of light transmittance through the leaf  
641 discs was calculated from measurements of absorbance values of 660 nm red light  
642 taken every 2 min for 20 min (red light does not activate chloroplast movement). To  
643 induce chloroplast movement in the cells, the plate reader was programmed to eject the  
644 plate for exposure to the selected light intensity for two minutes. The plate was then  
645 moved back into the plate reader for recording of transmittance values (660 nm red light  
646 absorbance) for each well. After each reading, the plate was re-ejected to return to the  
647 blue light treatment. The cycle of recording transmittance values and incubating with  
648 blue light was repeated for the indicated time periods for a given light treatment. The

649 calculated changes in light transmittance values were normalized to be relative to the  
650 starting 'dark' position values.

651

652 **Primer List:**

|     |                              |                                     |
|-----|------------------------------|-------------------------------------|
| 653 | THRUMIN1 L141AK142A FWD      | ACAATGGTTAAGGCCGCCAGAACCGAGTCG      |
| 654 | THRUMIN1 L141AK142A REV      | CGACTCGGTTCTGGCGGCCTTAACCATTGT      |
| 655 | THRUMIN1 $\Delta$ WH2 SF     | AGCTTGAAGTGAGGGCCGAGTCGATGTCCAAGCTA |
| 656 | THRUMIN1 $\Delta$ WH2 SR     | TAGCTTGGACATCGACTCGGCCCTCACTTCAAGCT |
| 657 | THRUMIN1 $\Delta$ 135-201 SF | ATCGCCGCGCAAATCTTCCCGGAGAAGTG       |
| 658 | THRUMIN1 $\Delta$ 135-201 SR | CACTTCTCCGGGAAGATTTGCGCGGCGAT       |
| 659 | THRUMIN1 $\Delta$ 152-201 SF | CGATGTCCAAGCTAAGATTCCCGGAGAAGTGT    |
| 660 | THRUMIN1 $\Delta$ 152-201 SR | ACACTTCTCCGGGAATCTTAGCTTGGACATCG    |
| 661 | THRUMIN1 $\Delta$ 169-201 SF | CTACTCGGGCCTTTCCCGGAGAAGTG          |
| 662 | THRUMIN1 $\Delta$ 169-201 SR | CACTTCTCCGGGAAGGCCCGAGTAG           |
| 663 | THRUMIN1 $\Delta$ 186-201 SF | GAGAACGGAGGGAGTTCCCGGAGAAGTG        |
| 664 | THRUMIN1 $\Delta$ 186-201 SR | CACTTCTCCGGGAAGTCCCTCCGTTCTC        |
| 665 | THRUMIN1 S170A FWD           | TCGGGGCCTCGGGCCGTGAAGGAG            |
| 666 | THRUMIN1 S170A REV           | CTCCTTCACGGCCCGAGGCCCGA             |
| 667 | THRUMIN1 S170D FWD           | TCGGGGCCTCGGGACGTGAAGGAG            |
| 668 | THRUMIN1 S170D REV           | CTCCTTCACGTCCCGAGGCCCGA             |
| 669 | THRUMIN1 T104A FWD           | TAAACCTCCGGCGGCCCTCCACGG            |
| 670 | THRUMIN1 T104A REV           | CCGTGGAGGGGCCCGGAGGTTTA             |
| 671 | THRUMIN1 T104D FWD           | TAAACCTCCGGCGGACCCTCCACGG           |
| 672 | THRUMIN1 T104D REV           | CCGTGGAGGGTCCGCCGAGGTTTA            |
| 673 | THRUMIN1 S146A FWD           | AGAGAACCGAGGCCATGTCCAAGC            |
| 674 | THRUMIN1 S146A REV           | GCTTGGACATGGCCTCGGTTCTCT            |
| 675 | THRUMIN1 S146D FWD           | AGAGAACCGAGGACATGTCCAAGC            |
| 676 | THRUMIN1 S146D REV           | GCTTGGACATGTCCTCGGTTCTCT            |
| 677 | SALK_027277 RP               | GTTAAACCGCCGGAAGTAGAC               |
| 678 | SALK_027277 LP               | ACGAGTGAGAGACCTTGCAAG               |

|     |                        |                                                         |
|-----|------------------------|---------------------------------------------------------|
| 679 | 14-3-3 Omega attB1 FWD | GGGGACAAGTTTGTACAAAAAAGCAGGCTTAATGGCGTCTGGGCGTGAAG      |
| 680 | 14-3-3 Omega attB4 REV | GGGGACAACCTTTGTATAGAAAAGTTGGGTGCTGCTGTTCCCTCGGTCGGT     |
| 681 | 14-3-3 Chi attB1 FWD   | GGGGACAAGTTTGTACAAAAAAGCAGGCTTAATGGCGACACCAGGAGC        |
| 682 | 14-3-3 Chi attB4 REV   | GGGGACAACCTTTGTATAGAAAAGTTGGGTGGGATTGTTGCTCGTCAGCGGGT   |
| 683 | 14-3-3 KAPPA attB1 FWD | GGGGACAAGTTTGTACAAAAAAGCAGGCTTAATGGCGACGACCTTAAGC       |
| 684 | 14-3-3 KAPPA attB4 REV | GGGGACAACCTTTGTATAGAAAAGTTGGGTGGGCCTCATCCATCTGCTCC      |
| 685 | THRUMIN1 attB1 FWD     | GGGGACAAGTTTGTACAAAAAAGCAGGCTTAATGGGGTGACATCTTCCAAG     |
| 686 | THRUMIN1 attB4 REV     | GGGGACAACCTTTGTATAGAAAAGTTGGGTGATTAACAAAACACACGGGACAACG |
| 687 |                        |                                                         |
| 688 |                        |                                                         |



689 **Supplemental Material**

690 **Supplemental Movie S1**

691 Irradiation of a mesophyll cell with a microbeam of 470 nm blue light (rectangle) resulted  
692 in the initial loss of 35S:THRUMIN1:YFP (yellow channel) from cp-actin around the  
693 chloroplast periphery (chlorophyll autofluorescence in blue channel) and  
694 35S:THRUMIN1:YFP reassociation towards the leading edge as the chloroplasts exit  
695 the irradiated area.

696 **Supplemental Movie S2**

697 Exposure of a mesophyll cell to whole-field 470 nm blue light increases  
698 35S:THRUMIN1:YFP (yellow channel) association with the periphery of chloroplasts  
699 (chlorophyll autofluorescence in blue channel) with a bias to the leading edge of those  
700 chloroplasts that moved towards the cell edge.

701 **Supplemental Movie S3**

702 Stroma-localized tpFNR:YFP (yellow channel) and chlorophyll autofluorescence (blue  
703 channel) revealed pseudopod-like membrane protrusions associated with the leading  
704 edge of chloroplast movement in response to microbeam irradiation with 470 nm blue  
705 light (rectangle). The all-yellow organelles are plastids in the overlying epidermal cells.

706 **Supplemental Movie S4**

707 Stroma-localized tpFNR:YFP (yellow channel) and chlorophyll autofluorescence (blue  
708 channel) revealed pseudopod-like membrane revealed more randomly localized  
709 pseudopod-like protrusions, and chloroplast movements, when mesophyll cells were  
710 exposed to whole-field 470 nm blue light. The all-yellow organelles are plastids in the  
711 overlying epidermal cells.

712 **Supplemental Movie S5**

713 Stroma-localized tpFNR:YFP (yellow channel) and chlorophyll autofluorescence (blue  
714 channel) in mesophyll cell of the *thrumin1-2* mutant revealed minor development of  
715 pseudopod-like membrane protrusions in response to microbeam irradiation with 470  
716 nm blue light (rectangle). The all-yellow organelles are plastids in the overlying  
717 epidermal cells.

718 **Supplemental Movie S6**

719 Stroma-localized tpFNR:YFP (yellow channel) and chlorophyll autofluorescence (blue  
720 channel) in mesophyll cell of the *thrumin1-2* mutant revealed minor development of  
721 pseudopod-like membrane protrusions and erratic chloroplast movements in response  
722 to whole-field irradiation with 470 nm blue light (rectangle). The all-yellow organelles are  
723 plastids in the overlying epidermal cells.

724 **Supplemental Movie S7**

725 Transiently expressed 35S:THRUMIN1<sup>S170D</sup>:YFP in *N. benthamiana* failed to localize to  
726 filaments and conferred a more diffuse localization phenotype with or without whole-field  
727 470 nm blue light.

728 **Supplemental Movie S8**

729 THRUMIN1<sup>S170D</sup>:YFP mutant in *A. thaliana thrumin1-2* mutant plants showed diffuse  
730 localization but rescued the defective chloroplast movement phenotype.

731 **Supplemental Movie S9**

732 Non-phosphorylatable THRUMIN1<sup>S170A</sup>:YFP mutant expressed in *A. thaliana thrumin1-2*  
733 mutant plants showed both wild-type filament localization and chloroplast movements in  
734 response to whole-field 470 nm blue light.

735 **Supplemental Movie S10**

736 Non-phosphorylatable THRUMIN1<sup>S170A</sup>:YFP mutant expressed in *N. benthamiana*  
737 showed both wild-type filament localization and chloroplast movements in response to  
738 whole-field 470 nm blue light.

739 **Supplemental Movie S11**

740 Transiently expressed THRUMIN1<sup>S146D</sup>:YFP in *N. benthamiana* showed cytoplasmic  
741 localization rather than wild-type filamentous protein localization with or without whole-  
742 field 470 nm blue light.

743 **Supplemental Movie S12**

744 Transiently expressed THRUMIN1<sup>S146A</sup>:YFP in *N. benthamiana* localized strongly to cp-  
745 actin filaments and display biased localization away from cortical actin filaments with or  
746 without whole-field 470 nm blue light.

747 **Supplemental Movie S13**

748 Expression of 35S:THRUMIN1<sup>C317/320/351/354A</sup>:YFP in the *A. thaliana thrumin1-2* mutant  
749 resulted in increased localization of THRUMIN1 with cp-actin filaments around the  
750 chloroplast perimeter and failed to rescue chloroplast movements in response to whole-  
751 field 470 nm blue light.

752

753 **Acknowledgements**

754 We would like to acknowledge the Indiana University Light Microscopy Imaging Center  
755 for training and use of the scanning confocal microscope (Leica SP8), the Indiana  
756 University Laboratory for Biological Mass Spectrometry facility for sample analyses, and  
757 Dr. Sid Shaw for generously sharing his microscopy and image analysis expertise.

758 **Figure Legends**

759

760 **Figure 1.**

761 Schematic of THRUMIN1 showing known and predicted sites of interest. Previously  
762 known sites in the intrinsically disordered region (red) include the N-myristoylation and  
763 S-palmitoylation (plasma membrane tethering) and phosphorylation sites S113, S115,  
764 S164, and S166. S113, S115, S164, and S166 were previously reported as  
765 phosphorylation sites by (Boex-Fontvieille et al., 2014). Phosphorylation sites, T104 and  
766 S146, were identified in this study by mass spectrometry. Serine 170 is a putative  
767 phosphorylation site that we found in this study to be important for THRUMIN1 function.  
768 Two putative 14-3-3 recognition sites (amino acids 50-54 and 111-117) and a putative  
769 WASP Homology-2 (WH2) actin-binding domain (amino acids 127-144) were predicted  
770 by the Eukaryotic Linear Motif program. Putative zinc-binding cysteine residues are  
771 shown in the cysteine-rich region (green). The glutaredoxin-like domain (blue), has no  
772 known function in chloroplast movement (Whippo et al., 2011).

773

774 **Figure 2.**

775 THRUMIN1:YFP dynamically localizes to cp-actin filaments in a light-dependent  
776 manner. In a dark state (YFP excitation, 514nm), 35S:THRUMIN1:YFP expressed in  
777 *thrumin1-2 A. thaliana* cells displayed a uniform, basket-like organization around the  
778 chloroplast periphery. Within a minute of blue light stimulation (white rectangle),  
779 THRUMIN1:YFP disappeared and reorganized towards the leading edge of movement  
780 as indicated by the white arrows in the YFP channel. After 10 minutes of blue light

781 stimulation, the chloroplasts inside the white rectangle have exited the region and the  
782 THRUMIN1:YFP filaments started to become more peripheral around the chloroplasts.  
783 Chlorophyll autofluorescence is false-colored blue and the YFP channel is separated.  
784 Representative time-lapse images are shown for the dark treatment (514nm for YFP  
785 excitation) and blue light stimulation intervals (470nm and 514nm). The scale bar  
786 indicates a 5  $\mu$ m distance.

787

788 **Figure 3.**

789 Chloroplast membranes display directional amoeboid-like movements in response to  
790 blue light. (A) Col-0 wild type plants expressing the stroma-localized marker tpFNR:YFP  
791 were imaged in a dark state (YFP excitation, 514nm) and a blue light-stimulated region  
792 of interest (white rectangle, 470nm). As per normal chloroplast movement kinetics,  
793 within a minute of blue light stimulation the chloroplasts began to leave the region of  
794 interest with a membrane protrusion in the direction of movement (white arrows). When  
795 the region of blue light stimulation is altered to force a new direction of chloroplast  
796 movement (red rectangle), a new membrane protrusion in the direction of movement  
797 formed. (B) *thrumin1-2* mutant plants expressing the tpFNR:YFP marker did not exhibit  
798 robust membrane protrusions (white arrows) in response to a blue light stimulus (white  
799 rectangle). The chloroplasts moved in slow but sporadic patterns with no discernable  
800 membrane activity after 13 minutes of a blue light stimulus. Chlorophyll  
801 autofluorescence is false-colored blue and the YFP channel is false-colored yellow.  
802 Representative time-lapse images are shown for the dark treatment (514nm for YFP  
803 excitation) and blue light stimulation intervals (470nm and 514nm). The scale bar

804 indicates a 5  $\mu\text{m}$  distance. (C) THRUMIN1 association with the development of  
805 chloroplast membrane protrusions on the leading edge of chloroplasts in response to  
806 high blue light microbeam irradiation. Chloroplast membrane protrusion events were  
807 counted along the leading and lagging edges in wild type and *thrumin1-2* mutant  
808 backgrounds. The histograms show the total leading/lagging edge protrusion events for  
809 31 chloroplasts from 8 different cells for wild type and 30 chloroplasts from 9 different  
810 cells for the *thrumin1-2* mutant.

811

812 **Figure 4.**

813 Effect of deletion of the putative WH2 domain on the localization of THRUMIN1. (A)  
814 Transient expression of wild-type 35S:THRUMIN1:YFP in *N. benthamiana* leaves  
815 showed filamentous localization around the chloroplast periphery. (B) Deletion of the  
816 WH2 domain from THRUMIN1 and (C) mutagenesis of two conserved amino acid  
817 residues (L141 and K142) in the WH2 domain did not disrupt the filamentous  
818 localization compared to wild type. Chlorophyll autofluorescence is false-colored blue  
819 and the YFP channel is separated. All of the THRUMIN1 constructs were under control  
820 of 35S promoter. The scale bar indicates a 5  $\mu\text{m}$  distance. (D) Light transmittance assay  
821 of chloroplast movements in wildtype (WT) Col-0, *thrumin1-2* mutant, *thrumin1-2*  
822 35S:THRUMIN1:YFP, *thrumin1-2* 35S:THRUMIN1 $\Delta^{\text{WH2}}$ :YFP, and *thrumin1-2*  
823 35S:THRUMIN1<sup>L141A/K142A</sup>:YFP rescue genotypes. Deletion of the WH2 domain  
824 conferred wild type chloroplast movements. After establishment of the baseline level of  
825 leaf light transmittance after dark acclimation, chloroplast movement was induced by  
826 treatment with low blue light ( $\sim 2 \mu\text{mol m}^{-2}\text{s}^{-1}$ ) followed by high blue light intensity ( $\sim 100$



827  $\mu\text{mol m}^{-2}\text{s}^{-1}$ ). Standard deviation error bars represent the variance in transmittance  
828 values for 8-12 individual plants per genotype.

829

830 **Figure 5.**

831 Phosphomimetic THRUMIN1 at serine 170 disrupted the filamentous localization but  
832 conferred wild type chloroplast movements. (A) *Agrobacterium* strains containing

833 internal deletion constructs of the IDR were transiently expressed in *N. benthamiana* to  
834 test the localization pattern of THRUMIN1:YFP in response to blue light stimulation.

835 Deletion of amino acids 186-201 restored the filamentous localization of THRUMIN1.

836 (B) Serine 170, a putative phosphorylation site between amino acids 169 and 186, was  
837 mutated to alanine or aspartic acid to mimic a non-phosphorylatable or constitutively

838 phosphorylated residue, respectively. Transient expression of 35S:THRUMIN1<sup>S170D</sup>:YFP  
839 in *N. benthamiana* disrupted the filamentous localization of THRUMIN1 while

840 35S:THRUMIN1<sup>S170A</sup>:YFP did not. Representative time-lapse images are shown for dark  
841 treatment (514nm for YFP excitation), blue light stimulation (470nm and 514nm), and

842 then dark again. The scale bar indicates a 5  $\mu\text{m}$  distance. (C) Leaf transmittance assays

843 testing the response to low and high blue light of Col-0 wild type, *thrumin1-2* mutant,

844 35S:THRUMIN1<sup>S170A</sup>:YFP rescue transgenic, and the 35S:THRUMIN1<sup>S170D</sup>:YFP rescue  
845 transgenic. Both mutant transgenic genotypes exhibited wild type chloroplast

846 movements. After establishment of the baseline level of leaf light transmittance after

847 dark acclimation, chloroplast movement was induced by treatment with low blue light

848 ( $\sim 2 \mu\text{mol m}^{-2}\text{s}^{-1}$ ) followed by high blue light intensity ( $\sim 100 \mu\text{mol m}^{-2}\text{s}^{-1}$ ). Standard

849 deviation error bars represent the variance in transmittance values for 8-12 individual  
850 plants per genotype.

851

852 **Figure 6.**

853 Constitutively phosphorylated and dephosphorylated THRUMIN1 at serine 113, 115,  
854 and 164 did not disrupt wild type THRUMIN1 localization or chloroplast movements. (A)  
855 Localization phenotypes of wildtype 35S:THRUMIN1:YFP and phosphorylation mutants  
856 35S:THRUMIN1<sup>S113/115/164A</sup>:YFP and 35S:THRUMIN1<sup>S113/115/164D</sup>:YFP via transient  
857 expression in *N. benthamiana*. Both transgenic mutant plant lines phenocopied the wild  
858 type protein localization. The scale bar indicates a 5  $\mu\text{m}$  distance. (B) Leaf  
859 transmittance assays demonstrated the full rescue phenotypes of  
860 35S:THRUMIN1<sup>S113/115/164A</sup>:YFP and 35S:THRUMIN1<sup>S113/115/164D</sup>:YFP lines compared to  
861 wildtype 35S:THRUMIN1:YFP. After establishment of the baseline level of leaf light  
862 transmittance after dark acclimation, chloroplast movement was induced by treatment  
863 with low blue light ( $\sim 2 \mu\text{mol m}^{-2}\text{s}^{-1}$ ) followed by high blue light intensity ( $\sim 100 \mu\text{mol m}^{-2}\text{s}^{-1}$ ).  
864 Standard deviation error bars represent the variance in transmittance values for 8-12  
865 individual plants per genotype.

866

867 **Figure 7.**

868 Phosphorylation mutants for THRUMIN1 displayed altered localization in *N.*  
869 *benthamiana* but not *A. thaliana*. (A) 35S:THRUMIN1<sup>S146A</sup>:YFP and  
870 35S:THRUMIN1<sup>S146D</sup>:YFP transiently expressed in *N. benthamiana* showed filamentous  
871 and cytoplasmic localization, respectively. (B) However, in *A. thaliana*,

872 35S:THRUMIN1<sup>S146A</sup>:YFP and 35S:THRUMIN1<sup>S146D</sup>:YFP expressed in the *thrumin1-2*  
873 mutant background and Col-0 WT background displayed wild type localization patterns.  
874 The scale bar indicates a 5  $\mu\text{m}$  distance. (C) Leaf transmittance assays of the mutant  
875 transgenic lines confirmed wild type chloroplast movements relative to the  
876 35S:THRUMIN1:YFP rescue line. After establishment of the baseline level of leaf light  
877 transmittance after dark acclimation, chloroplast movement was induced by treatment  
878 with low blue light ( $\sim 2 \mu\text{mol m}^{-2}\text{s}^{-1}$ ) followed by high blue light intensity ( $\sim 100 \mu\text{mol m}^{-2}\text{s}^{-1}$ ).  
879 Standard deviation error bars represent the variance in transmittance values for 8-12  
880 individual plants per genotype.

881

882 **Figure 8.**

883 THRUMIN1 associates with 14-3-3 KAPPA and OMEGA in phosphorylation-dependent  
884 manners. (A) THRUMIN1 phosphorylation mutants THRUMIN1<sup>S113/115A</sup>:YFP and  
885 THRUMIN1<sup>S113/115D</sup>:YFP were transiently expressed under the 35S viral promoter in *N.*  
886 *benthamiana* and did not co-immunoprecipitate with 35S:KAPPA:HA. Wild type  
887 35S:THRUMIN1:YFP was used as a positive control and 35S:MYC:YFP was used as a  
888 negative control. (B) Leaf transmittance assays of THRUMIN1<sup>S113/115A</sup>:YFP and  
889 THRUMIN1<sup>S113/115D</sup>:YFP transgenic plants in the *thrumin1-2* rescue background  
890 exhibited wild type chloroplast movements and (C) localization patterns. After  
891 establishment of the baseline level of leaf light transmittance after dark acclimation,  
892 chloroplast movement was induced by treatment with low blue light ( $\sim 2 \mu\text{mol m}^{-2}\text{s}^{-1}$ )  
893 followed by high blue light intensity ( $\sim 100 \mu\text{mol m}^{-2}\text{s}^{-1}$ ). Standard deviation error bars  
894 represent the variance in transmittance values for 8-12 individual plants per genotype.

895 For the micrographs, chlorophyll autofluorescence is false-colored blue and the YFP  
896 channel is separated. The scale bar indicates a 5  $\mu\text{m}$  distance. All of the THRUMIN1  
897 constructs were under control of 35S promoter. (D) Mass spectrometry analysis  
898 revealed the association of 14-3-3 OMEGA with THRUMIN1 leading to validation by *in*  
899 *vivo* co-immunoprecipitation in *N. benthamiana*. 14-3-3 OMEGA also bound to  
900 THRUMIN1 in a phosphorylation-dependent manner using the same serine 113 and  
901 115 transgenic mutants as bait. (E) To verify 14-3-3 specificity, a co-  
902 immunoprecipitation assay using a different 14-3-3 protein fused with YFP as bait, 14-3-  
903 3 CHI, was tested for THRUMIN1 association in *N. benthamiana*. 35S:MYC:YFP served  
904 as a negative control while 35S:KAPPA:YFP served as a positive control.  
905 35S:THRUMIN1:HA associates with 35S:KAPPA:YFP and 35S:OMEGA:YFP, but not  
906 35S:CHI:YFP. 35S:OMEGA:YFP and 35S:KAPPA:HA demonstrated a typical 14-3-3  
907 heterodimerization. All protein samples were extracted 48 hours post-infiltration.  
908 Ponceau-S stain was used as a loading control for total protein as demonstrated by  
909 RuBisCO.

910

911 **Figure 9.**

912 Conserved cysteine residues regulate THRUMIN1 filament reorganization and proper  
913 chloroplast movement. (A) Plants expressing 35S:THRUMIN1<sup>C317/320/351/354A</sup>:YFP in the  
914 *thrumin1-2* mutant background phenocopied the defective chloroplast movements  
915 assayed by leaf transmittance. After establishment of the baseline level of leaf light  
916 transmittance after dark acclimation, chloroplast movement was induced by treatment  
917 with low blue light ( $\sim 2 \mu\text{mol m}^{-2}\text{s}^{-1}$ ) followed by high blue light intensity ( $\sim 100 \mu\text{mol m}^{-2}\text{s}^{-1}$ )

918 <sup>1</sup>). Standard deviation error bars represent the variance in transmittance values for 8-12  
919 individual plants per genotype. (B) 35S:THRUMIN1<sup>C317/320/351/354A</sup>:YFP expressed in  
920 *thrumin1-2* mutant plants displayed filamentous localization in a dominant-negative  
921 manner. In response to blue light, the filaments did not properly rearrange to facilitate  
922 effective chloroplast movement thus giving overall slower net movement.  
923 Representative time-lapse images are shown for dark treatment (514nm for YFP  
924 excitation), blue light stimulation (470nm and 514nm), and then dark again. Chlorophyll  
925 autofluorescence is false-colored blue and the YFP channel is false-colored yellow. The  
926 scale bar indicates a 5  $\mu$ m distance.

927

### 928 **Supplemental Figure S1**

929 THRUMIN1-cp-actin localization increased at the leading edge of *A. thaliana* palisade  
930 mesophyll chloroplasts in response to blue light. (A) Representative time-course plot of  
931 fluorescence intensities of THRUMIN1:YFP at the leading edge of a chloroplast versus  
932 the lagging edge of the chloroplast measured with KymographBuilder (see methods).  
933 Upon exposure to a high blue light microbeam (at 4 minutes), the fluorescence intensity  
934 of both the leading and lagging edge initially decreased, which was followed by an  
935 increase in THRUMIN1:YFP fluorescence intensity at the leading edge while the  
936 fluorescence intensity continued to decrease along the lagging edge. As the time course  
937 progressed, the leading edge fluorescence intensities of THRUMIN1:YFP decrease as  
938 the chloroplast moved out of the blue light microbeam. (B) Ratios of leading to lagging  
939 edge fluorescence intensities 2 minutes before the fluorescence at the leading edge  
940 reached its peak, at its peak, and 2 minutes after the peak. The data were collected

941 from 13 chloroplasts from 7 cells. The results show that the leading/lagging-edge  
942 fluorescence ratio is statistically significant ( $p=0.0291$ ). Error bars = standard deviation.

943  
944 **Supplemental Figure S2**

945 Threonine 104 does not alter the filamentous localization of THRUMIN1. (A) *N.*  
946 *benthamiana* cells transiently expressing 35S:THRUMIN1<sup>T104A</sup>:YFP displayed no  
947 alterations to the localization pattern of wild type THRUMIN1. (B) Similarly, the  
948 phosphomimetic variant 35S:THRUMIN1<sup>T104D</sup>:YFP did not alter the localization of  
949 THRUMIN1 when expressed transiently in *N. benthamiana*. Representative time-lapse  
950 images are shown (514nm for YFP excitation) and chlorophyll autofluorescence is false-  
951 colored blue while the YFP channel is false-colored yellow. The scale bar indicates a 5  
952  $\mu\text{m}$  distance.

953  
954 **Supplemental Figure S3**

955 Mutations to THRUMIN1's conserved cysteines altered reorganization of the cp-actin at  
956 the chloroplast periphery. (A) Representative time-course plot of fluorescence  
957 intensities of leading and lagging edges of mesophyll chloroplasts in *Arabidopsis*  
958 expressing 35S:THRUMIN1<sup>C317/320/351/354A</sup>:YFP as measured with KymographBuilder  
959 (see methods). Upon exposure to a high blue light microbeam (at 2.6 minutes), the  
960 fluorescence intensity of both the leading and lagging edge decreased followed by an  
961 increase in both the leading and lagging edge fluorescence intensity. As the time course  
962 progressed, the leading and lagging edge fluorescence intensities of  
963 THRUMIN1<sup>C317/320/351/354A</sup>:YFP fluctuated and there was very little chloroplast movement  
964 as seen in Fig. 9. (B) Ratios of leading to lagging edge fluorescence intensities 2



965 minutes before the fluorescence at the leading edge reached its peak, at its peak, and 2  
966 minutes after the peak. The data were collected from 15 chloroplasts from 7 cells. The  
967 results show that the leading/lagging-edge fluorescence ratio was not statistically  
968 significant ( $p=.0575$ ) with the 35S:THRUMIN1<sup>C317/320/351/354A</sup>:YFP mutant. Error bars =  
969 standard deviation.

970

## Parsed Citations

- Atanassov, Il, Atanassov, Il, Etchells JP, Turner SR (2009) A simple, flexible and efficient PCR-fusion/Gateway cloning procedure for gene fusion, site-directed mutagenesis, short sequence insertion and domain deletions and swaps. *Plant Methods* 5: 14**  
Google Scholar: [Author Only](#) [Title Only](#) [Author and Title](#)
- Avisar D, Prokhnevsky AI, Makarova KS, Koonin EV, Dolja VV (2008) Myosin XI-K Is required for rapid trafficking of Golgi stacks, peroxisomes, and mitochondria in leaf cells of *Nicotiana benthamiana*. *Plant Physiol* 146: 1098-1108**  
Google Scholar: [Author Only](#) [Title Only](#) [Author and Title](#)
- Boex-Fontvieille E, Jossier M, Davanture M, Zivy M, Hodges M, Tcherkez G (2014) Differential Protein Phosphorylation Regulates Chloroplast Movement in Response to Strong Light and Darkness in *Arabidopsis thaliana*. *Plant Molecular Biology Reporter* 32: 987-1001**  
Google Scholar: [Author Only](#) [Title Only](#) [Author and Title](#)
- Briggs WR, Huala E (1999) Blue-light photoreceptors in higher plants. *Annu Rev Cell Dev Biol* 15: 33-62**  
Google Scholar: [Author Only](#) [Title Only](#) [Author and Title](#)
- Clough SJ, Bent AF (1998) Floral dip: a simplified method for *Agrobacterium*-mediated transformation of *Arabidopsis thaliana*. *Plant J* 16: 735-743**  
Google Scholar: [Author Only](#) [Title Only](#) [Author and Title](#)
- Davis PA, Hangarter RP (2012) Chloroplast movement provides photoprotection to plants by redistributing PSII damage within leaves. *Photosynth Res* 112: 153-161**  
Google Scholar: [Author Only](#) [Title Only](#) [Author and Title](#)
- DeBlasio SL, Mullen JL, Luesse DR, Hangarter RP (2003) Phytochrome modulation of blue light-induced chloroplast movements in *Arabidopsis*. *Plant Physiol* 133: 1471-1479**  
Google Scholar: [Author Only](#) [Title Only](#) [Author and Title](#)
- DeLille JM, Sehne PC, Ferl RJ (2001) The *Arabidopsis* 14-3-3 family of signaling regulators. *Plant Physiology* 126: 35-38**  
Google Scholar: [Author Only](#) [Title Only](#) [Author and Title](#)
- Earley KW, Haag JR, Pontes O, Opper K, Juehne T, Song K, Pikaard CS (2006) Gateway-compatible vectors for plant functional genomics and proteomics. *Plant J* 45: 616-629**  
Google Scholar: [Author Only](#) [Title Only](#) [Author and Title](#)
- Gouw M, Michael S, Samano-Sanchez H, Kumar M, Zeke A, Lang B, Bely B, Chemes LB, Davey NE, Deng Z, Diella F, Gurth CM, Huber AK, Kleinsorg S, Schlegel LS, Palopoli N, Roey KV, Altenberg B, Remenyi A, Dinkel H, Gibson TJ (2018) The eukaryotic linear motif resource - 2018 update. *Nucleic Acids Res* 46: D428-D434**  
Google Scholar: [Author Only](#) [Title Only](#) [Author and Title](#)
- Hertzog M, van Heijenoort C, Didry D, Gaudier M, Coutant J, Gigant B, Didelot G, Preat T, Knossow M, Guittet E, Carlier MF (2004) The beta-thymosin/WH2 domain; structural basis for the switch from inhibition to promotion of actin assembly. *Cell* 117: 611-623**  
Google Scholar: [Author Only](#) [Title Only](#) [Author and Title](#)
- Jarillo JA, Gabrys H, Capel J, Alonso JM, Ecker JR, Cashmore AR (2001) Phototropin-related NPL1 controls chloroplast relocation induced by blue light. *Nature* 410: 952-954**  
Google Scholar: [Author Only](#) [Title Only](#) [Author and Title](#)
- Kadota A, Yamada N, Suetsugu N, Hirose M, Saito C, Shoda K, Ichikawa S, Kagawa T, Nakano A, Wada M (2009) Short actin-based mechanism for light-directed chloroplast movement in *Arabidopsis*. *Proc Natl Acad Sci U S A* 106: 13106-13111**  
Google Scholar: [Author Only](#) [Title Only](#) [Author and Title](#)
- Kagawa T, Sakai T, Suetsugu N, Oikawa K, Ishiguro S, Kato T, Tabata S, Okada K, Wada M (2001) *Arabidopsis* NPL1: a phototropin homolog controlling the chloroplast high-light avoidance response. *Science* 291: 2138-2141**  
Google Scholar: [Author Only](#) [Title Only](#) [Author and Title](#)
- Kandasamy MK, Meagher RB (1999) Actin-organelle interaction: association with chloroplast in *Arabidopsis* leaf mesophyll cells. *Cell Motil Cytoskeleton* 44: 110-118**  
Google Scholar: [Author Only](#) [Title Only](#) [Author and Title](#)
- Kasahara M, Kagawa T, Oikawa K, Suetsugu N, Miyao M, Wada M (2002) Chloroplast avoidance movement reduces photodamage in plants. *Nature* 420: 829-832**  
Google Scholar: [Author Only](#) [Title Only](#) [Author and Title](#)
- Kong SG, Arai Y, Suetsugu N, Yanagida T, Wada M (2013) Rapid severing and motility of chloroplast-actin filaments are required for the chloroplast avoidance response in *Arabidopsis*. *Plant Cell* 25: 572-590**  
Google Scholar: [Author Only](#) [Title Only](#) [Author and Title](#)
- Li Z, Wakao S, Fischer BB, Niyogi KK (2009) Sensing and responding to excess light. *Annu Rev Plant Biol* 60: 239-260**  
Google Scholar: [Author Only](#) [Title Only](#) [Author and Title](#)

**Liscum E, Briggs WR (1995) Mutations in the NPH1 locus of Arabidopsis disrupt the perception of phototropic stimuli. Plant Cell 7: 473-485**

Google Scholar: [Author Only](#) [Title Only](#) [Author and Title](#)

**Loomis PA, Kelly AE, Zheng L, Changyaleket B, Sekerkova G, Mugnaini E, Ferreira A, Mullins RD, Bartles JR (2006) Targeted wild-type and jerker espins reveal a novel, WH2-domain-dependent way to make actin bundles in cells. J Cell Sci 119: 1655-1665**

Google Scholar: [Author Only](#) [Title Only](#) [Author and Title](#)

**Luesse DR, DeBlasio SL, Hangarter RP (2010) Integration of Phot1, Phot2, and PhyB signalling in light-induced chloroplast movements. J Exp Bot 61: 4387-4397**

Google Scholar: [Author Only](#) [Title Only](#) [Author and Title](#)

**Malec P, Rinaldi RA, Gabrys H (1996) Light-induced chloroplast movements in Lemna trisulca. Identification of the motile system. Plant Science 120: 127-137**

Google Scholar: [Author Only](#) [Title Only](#) [Author and Title](#)

**Oikawa K, Kasahara M, Kiyosue T, Kagawa T, Suetsugu N, Takahashi F, Kanegae T, Niwa Y, Kadota A, Wada M (2003) Chloroplast unusual positioning1 is essential for proper chloroplast positioning. Plant Cell 15: 2805-2815**

Google Scholar: [Author Only](#) [Title Only](#) [Author and Title](#)

**Oikawa K, Yamasato A, Kong SG, Kasahara M, Nakai M, Takahashi F, Ogura Y, Kagawa T, Wada M (2008) Chloroplast outer envelope protein CHUP1 is essential for chloroplast anchorage to the plasma membrane and chloroplast movement. Plant Physiol 148: 829-842**

Google Scholar: [Author Only](#) [Title Only](#) [Author and Title](#)

**Pace NJ, Weerapana E (2014) Zinc-binding cysteines: diverse functions and structural motifs. Biomolecules 4: 419-434**

Google Scholar: [Author Only](#) [Title Only](#) [Author and Title](#)

**Paunola E, Mattila PK, Lappalainen P (2002) WH2 domain: a small, versatile adapter for actin monomers. FEBS Lett 513: 92-97**

Google Scholar: [Author Only](#) [Title Only](#) [Author and Title](#)

**Qi D, DeYoung BJ, Innes RW (2012) Structure-function analysis of the coiled-coil and leucine-rich repeat domains of the RPS5 disease resistance protein. Plant Physiol 158: 1819-1832**

Google Scholar: [Author Only](#) [Title Only](#) [Author and Title](#)

**Rosenquist M, Sehne P, Ferl RJ, Sommarin M, Larsson C (2000) Evolution of the 14-3-3 protein family: Does the large number of isoforms in multicellular organisms reflect functional specificity? Journal of Molecular Evolution 51: 446-458**

Google Scholar: [Author Only](#) [Title Only](#) [Author and Title](#)

**Sakai T, Kagawa T, Kasahara M, Swartz TE, Christie JM, Briggs WR, Wada M, Okada K (2001) Arabidopsis nph1 and npl1: blue light receptors that mediate both phototropism and chloroplast relocation. Proc Natl Acad Sci U S A 98: 6969-6974**

Google Scholar: [Author Only](#) [Title Only](#) [Author and Title](#)

**Schmidt von Braun S, Schleiff E (2008) The chloroplast outer membrane protein CHUP1 interacts with actin and profilin. Planta 227: 1151-1159**

Google Scholar: [Author Only](#) [Title Only](#) [Author and Title](#)

**Suetsugu N, Dolja VV, Wada M (2010) Why have chloroplasts developed a unique motility system? Plant Signal Behav 5: 1190-1196**

Google Scholar: [Author Only](#) [Title Only](#) [Author and Title](#)

**Tseng TS, Whippo C, Hangarter RP, Briggs WR (2012) The role of a 14-3-3 protein in stomatal opening mediated by PHOT2 in Arabidopsis. Plant Cell 24: 1114-1126**

Google Scholar: [Author Only](#) [Title Only](#) [Author and Title](#)

**Tzivion G, Shen YH, Zhu J (2001) 14-3-3 proteins; bringing new definitions to scaffolding. Oncogene 20: 6331-6338**

Google Scholar: [Author Only](#) [Title Only](#) [Author and Title](#)

**Wada M (2013) Chloroplast movement. Plant Sci 210: 177-182**

Google Scholar: [Author Only](#) [Title Only](#) [Author and Title](#)

**Whippo CW, Khurana P, Davis PA, DeBlasio SL, DeSloover D, Staiger CJ, Hangarter RP (2011) THRUMIN1 is a light-regulated actin-bundling protein involved in chloroplast motility. Curr Biol 21: 59-64**

Google Scholar: [Author Only](#) [Title Only](#) [Author and Title](#)

**Zurzycki J (1955) The dependence of photosynthesis on the arrangement of chloroplasts. Experientia 11: 263**

Google Scholar: [Author Only](#) [Title Only](#) [Author and Title](#)
